# Supplementary material for: Copper-related toxicity in replicating and dormantMycobacterium tuberculosiscaused by 1-hydroxy-5-R-pyridine-2(1H)-thiones
Source: Royal Society of Chemistry journal article supplement (doi:10.1039/c8mt00067k), 2018-01-01
Supplement: c8mt00067k1.pdf [file c8mt00067k1.pdf]

**Supplementary file 1.** Synthetic route for 1-hydroxy-5-R-pyridine-2(1*H*)-thiones 2a-c.

**General Procedure**

Solution of 2-[[amino(imino)methyl]thio]-1-hydroxy-5-R-pyridinium chloride (1 mmol) in 15 mL of water was treated by solution of 2 mmol sodium carbonate in 10 mL of water at room temperature. After 4 hours reaction mixture was acidified by conc water hydrochloric acid to pH~1 and formatted solid was filtered off.

*Methyl 1-hydroxy-6-thioxo-1,6-dihydropyridine-3-carboxylate 2a.* Yield 58%. Mp. 76-9°C (hexane). Mass (EI),  $m/z$  ( $I_{relat.}$ (%)): 184.2014  $[M]^+$  (72).  $C_7H_7NO_3S$ .  $^1H$  NMR (DMSO- $d_6$ ): 3.77 (s, 3H, OCH<sub>3</sub>), 7.57 (d, 1H,  $J = 9.8$  Hz, CH), 7.69 (d, 1H,  $J = 9.8$  Hz, CH), 8.74 (s, 1H, CH) ppm.

*Ethyl 1-hydroxy-6-thioxo-1,6-dihydropyridine-3-carboxylate 2b.* Yield 74%. Mp. 67-9°C (hexane). Mass (EI),  $m/z$  ( $I_{relat.}$ (%)): 198.2280  $[M]^+$  (84).  $C_8H_9NO_3S$ .  $^1H$  NMR (DMSO- $d_6$ ): 1.28 (t, 3H,  $J = 6.9$  Hz, CH<sub>3</sub>), 4.28 (q, 2H,  $J = 7.2$  Hz, CH<sub>2</sub>), 7.59 (d, 1H,  $J = 9.8$  Hz, CH), 7.68 (d, 1H,  $J = 9.8$  Hz, CH), 8.74 (s, 1H, CH) ppm.

*1-Hydroxy-5-(trifluoromethyl)pyridine-2(1H)-thione 2c.* Yield 67%. Mp. 83-5°C (hexane). Mass (EI),  $m/z$  ( $I_{relat.}$ (%)): 194.1633  $[M]^+$  (62).  $C_6H_4F_3NOS$ .  $^1H$  NMR (DMSO- $d_6$ ): 7.41 (d, 1H,  $J = 9.7$  Hz, CH), 7.58 (d, 1H,  $J = 9.7$  Hz, CH), 8.69 (s, 1H, CH) ppm.

**Supplementary file 2.** Synthesis of metabolites **3** and **4** of [2HPT-Cu<sup>2+</sup>].

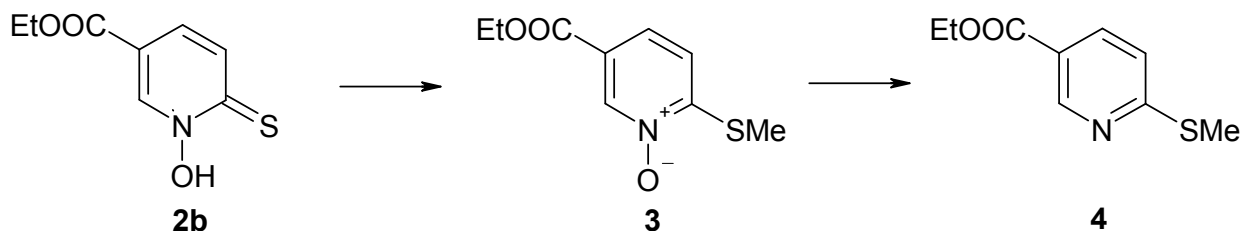

*Ethyl 6-(methylthio)nicotinate 1-oxide 3*

Solution of ethyl 1-hydroxy-6-thioxo-1,6-dihydropyridine-3-carboxylate **2b** (500 mg, 2.35 mmol) in 15 mL of ethanol was treated by solution sodium hydroxide (100 mg, 2.5 mmol) in 1 mL of water at room temperature. After 1 hours reaction mixture was treated by methyl iodide (0.3 mL, 4.8 mmol) in one portion, left at this temperature for 2 hours and evaporated under vacuum. The yellow residue was recrystallised from ethylacetate. The yield of aim ethyl 6-(methylthio)nicotinate 1-oxide **3** was 88%. Mp. 119-21°C. Mass (EI),  $m/z$  ( $I_{relat.}(\%)$ ): 212.2546  $[M]^+$  (37). C<sub>9</sub>H<sub>11</sub>NO<sub>3</sub>S. <sup>1</sup>H NMR (DMSO-*d*<sub>6</sub>): 1.29 (t, 3H,  $J = 6.8$  Hz, CH<sub>3</sub>), 2.56 (s, 3H, SCH<sub>3</sub>), 4.31 (q, 2H,  $J = 7.2$  Hz, CH<sub>2</sub>), 7.61 (d, 1H,  $J = 9.7$  Hz, CH), 7.72 (d, 1H,  $J = 9.7$  Hz, CH), 8.67 (s, 1H, CH) ppm.

*Ethyl 6-(methylthio)nicotinate 4*

Ethyl 6-(methylthio)nicotinate 1-oxide **3** (300 mg, 1.4 mmol) was solved in 15 ml of chloroform and phosphorus trichloride (0.24 mL, 2.8 mmol) was slow added by drop at 20 °C. The reaction mixture was left for 1 hour at room temperature, new portion of phosphorus trichloride (0.24 mL, 2.8 mmol) was added. The mixture was refluxed for 5 hours, cooled, dissolved by 50 mL of cold water and treated by saturated solution of sodium carbonate in water till pH~9. Organic phase was separated and washed 3 times by water, dried by sodium sulfate, filtered off through silica gel cushion and evaporated in vacuum. The yield of aim ethyl 6-(methylthio)nicotinate **4** was 39% as yellow oil. Mass (EI),  $m/z$  ( $I_{relat.}(\%)$ ): 196.2552  $[M]^+$  (93). C<sub>9</sub>H<sub>11</sub>NO<sub>2</sub>S. <sup>1</sup>H NMR (DMSO-*d*<sub>6</sub>): 1.33 (t, 3H,  $J = 6.8$  Hz, CH<sub>3</sub>), 2.49 (s, 3H, SCH<sub>3</sub>), 4.32 (q, 2H,  $J = 7.2$  Hz, CH<sub>2</sub>), 7.12 (d, 1H,  $J = 8.6$  Hz, CH), 7.71 (d, 1H,  $J = 8.6$  Hz, CH), 8.91 (s, 1H, CH) ppm.

### Supplementary file 3. qPCR primers

#### qPCR

|           |                          |
|-----------|--------------------------|
| Rv0186A_F | GGCTGTGGCTGTCCGGGTTTCG   |
| Rv0186A_R | TGCAGCGGTAGGCGTCAC       |
| Rv0846_F  | GGACGGACGGCATCGGGAAGT    |
| Rv0846_R  | TGTCGGCGGCGGCGCTGTTGATGA |
| Rv0967_F  | GGCGCTGAACCGGCTGAAGA     |
| Rv0967_R  | CGAGGACTGAACCGCTGAAT     |
| Rv1909c_F | TGAATGCGCATCCACACG       |
| Rv1909c_R | CGCAAGACCGGCAGAGGA       |
| Rv1992c_F | GCTACCGCGGCCAACAACTC     |
| Rv1992c_R | GGCGGCGGCGACTAATACCAC    |
| Rv1994c_F | TTCTGGTGGCGTTGCTGGATG    |
| Rv1994c_R | CACCGCGAGAACGACCTGGAC    |
| Rv2641_F  | GCCGCAATCACGTTCTACTCC    |
| Rv2641_R  | ACGTGGTGCCGATCTCCTTCT    |
| Rv3270_F  | GCGCGGCAACCAGGACACG      |
| Rv3270_R  | CGCGCACCACGACCGAACC      |
