# Supplementary material for: Copper-related toxicity in replicating and dormantMycobacterium tuberculosiscaused by 1-hydroxy-5-R-pyridine-2(1H)-thiones
Source: Royal Society of Chemistry journal article supplement (doi:10.1039/c8mt00067k), 2018-01-01
Supplement: c8mt00067k2.xlsx [file c8mt00067k2.xlsx]

## Sheet: FDR<0.05
Gene	Product	logFC	logCPM	PValue	FDR
	Rv1673c	8.94001	11.0123	1.18525e-50	4.87257e-47
	Rv1674c	9.2987	10.2075	2.66647e-50	5.48093e-47
cadI	Rv2641	8.20466	12.2746	1.82124e-47	2.49571e-44
mymT	Rv0186A	8.13538	11.894	9.95772e-47	1.0234e-43
	Rv2642	8.15319	10.9134	1.06744e-45	8.77646e-43
lpqS	Rv0847	7.95434	10.35	1.0237e-43	7.01404e-41
	Rv3054c	7.9271	9.78705	1.21146e-42	7.11473e-40
cmtR	Rv1994c	7.43497	11.4982	9.72039e-42	4.99506e-39
	Rv1993c	6.68903	11.1825	2.10601e-36	9.61977e-34
hsp	Rv0251c	6.52676	11.2247	2.69666e-35	1.1086e-32
	Rv2640c	6.60603	9.83835	7.95156e-35	2.97172e-32
arsC	Rv2643	6.28797	9.77137	8.79312e-33	3.01238e-30
	Rv2963	6.19832	9.77111	3.37541e-32	1.06741e-29
	Rv3269	6.01475	12.2001	5.59327e-32	1.64243e-29
ctpG	Rv1992c	6.01057	11.7692	7.15304e-32	1.96041e-29
csoR	Rv0967	6.09863	9.72873	1.49822e-31	3.84949e-29
	Rv1995	6.42053	7.7968	2.58947e-30	6.26196e-28
	Rv2466c	5.70355	11.8753	1.0611e-29	2.42343e-27
furA	Rv1909c	5.66694	10.6336	3.83607e-29	8.30003e-27
	Rv0140	5.45081	11.7261	6.72334e-28	1.38198e-25
	Rv0849	5.69032	8.31401	2.12903e-27	4.16783e-25
ctpC	Rv3270	5.21835	12.4992	1.99108e-26	3.7206e-24
	Rv0846c	5.39055	8.79483	3.183e-26	5.68928e-24
	Rv0968	5.3009	9.27569	4.64911e-26	7.96354e-24
	Rv3463	5.10527	11.5363	1.85622e-25	3.05237e-23
ctpV	Rv0969	4.99092	10.7465	1.62248e-24	2.56539e-22
cysK2	Rv0848	4.99221	9.70557	3.2244e-24	4.90945e-22
clpB	Rv0384c	4.85556	12.4094	7.48256e-24	1.0986e-21
	Rv2699c	4.75557	11.2887	5.36926e-23	7.61138e-21
	Rv1697	-5.01695	8.05407	6.80073e-23	9.31926e-21
trxB1	Rv1471	4.70315	10.9619	1.36825e-22	1.75777e-20
mctB	Rv1698	-5.71796	6.56293	1.36291e-22	1.75777e-20
virS	Rv3082c	4.91758	7.69161	3.6706e-22	4.57268e-20
	Rv2639c	4.83797	7.73575	8.88832e-22	1.0747e-19
	Rv0991c	4.55623	10.7862	1.47212e-21	1.72911e-19
	Rv0990c	4.53942	9.15205	5.12497e-21	5.85243e-19
	Rv0850	5.20604	6.22962	8.43203e-21	9.36866e-19
	Rv3334	4.56905	8.27706	1.12987e-20	1.22234e-18
cysN	Rv1286	4.3512	10.0144	4.74758e-20	5.00444e-18
	Rv1158c	-4.67163	7.41149	6.02559e-20	6.1928e-18
trxB2	Rv3913	4.2777	11.8196	7.76017e-20	7.78099e-18
cysD	Rv1285	4.34024	9.09774	9.81364e-20	9.60568e-18
	Rv1460	4.16374	9.99681	8.07887e-19	7.72378e-17
fbpC	Rv0129c	-4.16579	9.158	1.58831e-18	1.47994e-16
trxC	Rv3914	4.0846	11.2421	1.61998e-18	1.47994e-16
moeB1	Rv3206c	4.03818	11.1971	3.32434e-18	2.97095e-16
	Rv1672c	4.07984	8.56382	7.10495e-18	6.21457e-16
PPE15	Rv1039c	4.36827	6.23631	2.9834e-17	2.55516e-15
rshA	Rv3221A	3.89914	9.87217	4.54683e-17	3.8147e-15
	Rv3209	-4.48198	6.28589	6.24387e-17	5.13371e-15
	Rv1461	3.81894	12.5232	8.90477e-17	7.17794e-15
katG	Rv1908c	3.76232	12.0406	2.12084e-16	1.67669e-14
thiX	Rv0816c	3.97965	7.17029	2.76096e-16	2.14157e-14
subI	Rv2400c	3.79078	9.19848	2.95317e-16	2.24823e-14
	Rv1979c	-3.99858	7.20533	3.42537e-16	2.56031e-14
papA4	Rv1528c	4.13021	6.27248	3.92233e-16	2.87941e-14
PPE29	Rv1801	4.03293	6.62539	4.72798e-16	3.40995e-14
	Rv1701	-4.25665	6.1469	1.03366e-15	7.32648e-14
	Rv2864c	-3.97109	6.71225	1.95864e-15	1.36474e-13
	Rv1585c	3.88785	6.62903	2.55202e-15	1.7199e-13
rpiB	Rv2465c	3.63676	9.40333	2.54422e-15	1.7199e-13
mazE6	Rv1991A	3.78886	6.99128	4.55684e-15	3.02148e-13
sdaA	Rv0069c	3.60066	8.85139	5.53302e-15	3.61051e-13
xerC	Rv2894c	-4.02497	6.18837	9.523e-15	6.11704e-13
	Rv1586c	3.59669	8.01353	1.04305e-14	6.59689e-13
	Rv2707	3.48955	10.5147	1.51222e-14	9.41927e-13
	Rv0485	3.47383	10.427	1.9241e-14	1.18059e-12
	Rv3222c	3.45503	10.8442	2.11408e-14	1.27809e-12
ftsZ	Rv2150c	-3.54016	8.36296	2.29041e-14	1.36462e-12
	Rv1157c	-3.61077	7.5701	2.72309e-14	1.59923e-12
zur	Rv2359	3.5277	8.03239	2.90045e-14	1.6794e-12
cysO	Rv1335	3.44748	9.54431	3.53675e-14	2.01938e-12
	Rv0190	3.45596	8.35134	5.7004e-14	3.21018e-12
dnaJ1	Rv0352	3.34898	12.1206	9.21057e-14	5.11684e-12
	Rv0196	3.48385	7.31988	1.20881e-13	6.62588e-12
	Rv2033c	-3.58736	6.73755	1.94875e-13	1.05412e-11
mec	Rv1334	3.31983	9.38989	2.17923e-13	1.16348e-11
	Rv2638	3.50878	6.71184	2.46586e-13	1.29963e-11
	Rv0197	3.30382	9.56529	2.59874e-13	1.35233e-11
	Rv2147c	-3.33069	8.2279	4.59495e-13	2.36123e-11
lgt	Rv1614	-3.28517	9.0128	4.78097e-13	2.42649e-11
mcr19	RVnc0019	3.29605	7.53789	9.3189e-13	4.61566e-11
	Rv3833	3.31169	7.3978	9.28405e-13	4.61566e-11
	Rv0687	3.23032	8.75345	9.63342e-13	4.71464e-11
	Rv1251c	-3.28263	7.28878	2.53425e-12	1.2196e-10
	Rv2204c	3.11383	12.0326	2.55134e-12	1.2196e-10
	Rv0430	-3.18622	8.05121	3.26611e-12	1.54333e-10
plcB	Rv2350c	-3.36961	6.56995	3.42056e-12	1.59795e-10
	Rv1026	-3.7402	5.35911	5.50542e-12	2.54301e-10
ahpC	Rv2428	3.06212	10.3296	5.67151e-12	2.59062e-10
	Rv1700	-3.42385	6.13045	5.99968e-12	2.71041e-10
trpA	Rv1613	-3.15481	7.71964	6.84327e-12	3.0579e-10
	Rv3333c	3.47108	5.48632	8.16704e-12	3.61018e-10
	Rv2823c	3.09826	7.86461	9.09895e-12	3.97408e-10
	Rv3920c	-3.13792	7.60825	9.18359e-12	3.97408e-10
	Rv1395	3.20335	6.70321	9.33527e-12	3.99764e-10
	Rv0519c	-3.38451	6.05295	1.26058e-11	5.34254e-10
	Rv1907c	3.06245	8.01932	1.32247e-11	5.54763e-10
smtB	Rv2358	3.09245	7.49363	1.45032e-11	6.02251e-10
	Rv0142	3.03111	8.10178	1.95906e-11	8.05371e-10
	Rv0970	3.02153	8.13189	2.22903e-11	9.0728e-10
dacB1	Rv3330	-3.15787	6.81133	2.57684e-11	1.03857e-09
glyA2	Rv0070c	3.00039	8.10214	2.895e-11	1.15261e-09
cyp135A1	Rv0327c	3.54634	4.94834	2.93606e-11	1.15261e-09
echA12	Rv1472	2.94064	10.3751	2.9439e-11	1.15261e-09
	Rv3717	-3.24233	6.08734	3.72884e-11	1.44616e-09
esxQ	Rv3017c	3.17346	6.14699	3.85888e-11	1.4826e-09
	Rv0324	3.1354	6.22653	4.7643e-11	1.81352e-09
	Rv0890c	-3.04468	7.07638	6.13514e-11	2.31391e-09
	Rv1874	2.94808	7.97095	6.24976e-11	2.33571e-09
	Rv0839	2.95058	7.83267	6.62645e-11	2.45418e-09
whiB4	Rv3681c	2.91689	8.35134	7.24763e-11	2.66027e-09
leuC	Rv2988c	2.88469	9.38133	7.88557e-11	2.86881e-09
ftsW	Rv2154c	-2.94731	7.89425	8.26002e-11	2.97868e-09
rplT	Rv1643	-2.94567	7.84671	8.88844e-11	3.17742e-09
	Rv1671	3.28225	5.35838	9.10777e-11	3.22776e-09
	Rv0100	-3.60155	4.9467	1.02842e-10	3.61354e-09
	Rv1813c	3.46144	4.80013	1.03774e-10	3.61539e-09
	Rv0397A	2.8954	7.60663	1.46166e-10	5.0495e-09
	Rv3033	3.01635	6.37974	1.57103e-10	5.38209e-09
	Rv3921c	-2.87213	8.29005	1.62645e-10	5.52591e-09
dnaK	Rv0350	2.79692	13.0638	1.81991e-10	6.13249e-09
	Rv0744c	2.92092	6.96928	1.89323e-10	6.32769e-09
	Rv1831	2.808	9.83079	1.97661e-10	6.55309e-09
	Rv1875	2.81806	8.33295	2.56213e-10	8.42634e-09
	Rv0794c	2.81301	8.31593	2.82623e-10	9.22114e-09
	Rv0892	-3.01359	6.3666	2.9769e-10	9.63624e-09
dnaJ2	Rv2373c	2.75059	10.1592	3.69144e-10	1.18559e-08
adh	Rv1530	2.8682	6.888	4.17755e-10	1.33131e-08
plcA	Rv2351c	-3.11036	5.7213	4.53726e-10	1.43482e-08
	Rv2189c	-3.0893	5.83272	4.71505e-10	1.47966e-08
	Rv2962c	2.74626	8.95641	5.20049e-10	1.61964e-08
	Rv2557	2.74117	8.81001	5.73431e-10	1.77246e-08
clgR	Rv2745c	2.7155	10.2166	5.78571e-10	1.775e-08
rpmI	Rv1642	-2.79945	7.6903	5.89886e-10	1.79631e-08
sigH	Rv3223c	2.70434	10.3776	6.60303e-10	1.99596e-08
	Rv2824c	2.89478	6.27206	7.28271e-10	2.18535e-08
	Rv1726	4.17955	3.49641	9.42127e-10	2.80658e-08
	Rv1587c	2.86467	6.18966	1.01969e-09	3.0158e-08
	Rv0250c	2.67662	9.65636	1.09255e-09	3.18545e-08
	Rv2074	-2.78209	7.17847	1.09115e-09	3.18545e-08
	Rv0097	-2.87934	6.40412	1.13175e-09	3.27649e-08
pyrG	Rv1699	-2.75896	7.38264	1.19283e-09	3.42917e-08
	Rv0841	4.32143	3.32035	1.20621e-09	3.44356e-08
	Rv1465	2.67322	9.09645	1.25958e-09	3.57114e-08
	Rv2172c	2.66479	9.60408	1.28501e-09	3.61826e-08
	Rv0325	3.01553	5.35991	1.34721e-09	3.76762e-08
	Rv1670	2.86518	5.94197	1.49277e-09	4.14647e-08
kmtR	Rv0827c	3.05824	5.11263	1.55734e-09	4.29681e-08
ahpD	Rv2429	2.62996	9.42604	2.01276e-09	5.51631e-08
fadE34	Rv3573c	2.73932	6.75163	2.05474e-09	5.59406e-08
nrp	Rv0101	-2.68337	7.84313	2.07023e-09	5.59916e-08
	Rv3705c	2.67424	7.76581	2.12504e-09	5.70984e-08
tsnR	Rv1644	-2.73337	7.14974	2.17237e-09	5.79909e-08
pstC1	Rv0935	-2.71164	7.18343	2.42041e-09	6.41956e-08
PPE1	Rv0096	-3.11942	5.1846	2.58599e-09	6.81474e-08
	Rv2558	2.60868	9.17241	2.744e-09	7.18509e-08
grpE	Rv0351	2.58348	11.79	2.89758e-09	7.5392e-08
cyp121	Rv2276	-2.78429	6.48351	3.0289e-09	7.83131e-08
cysM	Rv1336	2.58263	10.3715	3.10016e-09	7.96548e-08
	Rv1065	2.62088	8.08885	3.24442e-09	8.28437e-08
moaE1	Rv3119	2.59085	8.7959	3.7926e-09	9.6243e-08
plcC	Rv2349c	-2.85884	5.86072	4.06081e-09	1.02417e-07
	Rv2729c	2.6683	6.92116	4.37031e-09	1.09551e-07
	Rv3354	2.69301	6.47891	4.58928e-09	1.14343e-07
	Rv3122	2.58036	8.13119	5.30046e-09	1.31266e-07
	Rv2025c	2.69237	6.14914	7.21795e-09	1.77683e-07
	Rv0516c	2.52732	9.15542	7.64239e-09	1.85905e-07
	Rv1462	2.51163	10.1162	7.62378e-09	1.85905e-07
cysW	Rv2398c	2.56651	7.62109	7.94404e-09	1.90982e-07
	Rv3212	-2.61291	7.14933	7.93534e-09	1.90982e-07
lprE	Rv1252c	-2.85386	5.54263	8.13917e-09	1.94536e-07
rsfA	Rv1365c	2.68164	6.12215	8.24611e-09	1.95952e-07
kshA	Rv3526	2.51457	8.90747	9.23756e-09	2.18251e-07
	Rv0111	-2.64259	6.62105	1.00054e-08	2.35041e-07
ppiA	Rv0009	-2.47682	9.03515	1.53729e-08	3.5908e-07
coaE	Rv1631	-2.53508	7.49145	1.57505e-08	3.6582e-07
	Rv2886c	2.64193	6.05183	1.62925e-08	3.76283e-07
	Rv1066	2.50498	7.56865	1.68281e-08	3.86482e-07
cysT	Rv2399c	2.52843	7.12742	1.7013e-08	3.88557e-07
lipX	Rv1169c	2.55714	6.65312	1.78054e-08	4.04409e-07
prpD	Rv1130	2.45505	9.02902	1.83044e-08	4.13459e-07
bkdA	Rv2497c	2.44579	9.52061	1.8856e-08	4.2359e-07
fadD19	Rv3515c	2.47804	8.01025	1.93968e-08	4.3337e-07
	Rv2085	-3.09494	4.60322	2.17141e-08	4.82522e-07
lppX	Rv2945c	-2.5463	6.78967	2.64128e-08	5.8378e-07
	Rv0826	2.89014	4.66527	2.6794e-08	5.89037e-07
leuD	Rv2987c	2.45837	7.66938	2.82053e-08	6.16766e-07
	Rv0743c	2.54022	6.27588	3.19471e-08	6.94893e-07
hspR	Rv0353	2.3811	9.67402	3.84344e-08	8.31598e-07
fadD10	Rv0099	-2.48309	6.92288	4.14679e-08	8.92537e-07
pstA2	Rv0936	-2.66174	5.58224	4.6346e-08	9.92335e-07
	Rv3693	-2.59355	5.94873	4.72608e-08	1.00668e-06
ubiA	Rv3806c	-2.53135	6.33166	5.04785e-08	1.06968e-06
cysA2	Rv0815c	2.34625	10.3192	5.55346e-08	1.17078e-06
	Rv0226c	-2.62132	5.75943	5.75051e-08	1.20614e-06
sapM	Rv3310	-2.49085	6.49247	6.13329e-08	1.2799e-06
	Rv1986	2.41625	7.03247	6.40505e-08	1.32317e-06
moaA1	Rv3109	-3.87793	3.60588	6.38192e-08	1.32317e-06
	Rv1025	-2.66657	5.46767	6.89459e-08	1.41718e-06
nuoM	Rv3157	-2.38382	7.82464	6.95681e-08	1.42286e-06
	Rv3922c	-2.46404	6.57537	8.06289e-08	1.64092e-06
fadE26	Rv3504	2.44411	6.41273	8.71455e-08	1.7648e-06
infC	Rv1641	-2.3133	9.34727	9.64412e-08	1.94348e-06
csd	Rv1464	2.30673	9.46312	9.85318e-08	1.97592e-06
prfA	Rv1299	2.30296	9.30513	1.06405e-07	2.12346e-06
	Rv1455	2.59835	5.26524	1.09099e-07	2.1667e-06
	Rv0759c	2.30325	8.93869	1.10719e-07	2.18829e-06
	Rv2454c	2.28486	10.7636	1.1189e-07	2.19138e-06
fadD18	Rv3513c	2.54166	5.46956	1.11941e-07	2.19138e-06
	Rv0792c	2.46887	5.84844	1.13501e-07	2.20096e-06
	Rv3241c	2.29018	9.55549	1.13287e-07	2.20096e-06
	Rv1767	2.50305	5.73793	1.16907e-07	2.25636e-06
sseC1	Rv3118	2.28999	9.46046	1.20697e-07	2.31862e-06
purU	Rv2964	2.41824	6.27226	1.21782e-07	2.32858e-06
pks1	Rv2946c	-2.30111	8.74114	1.27456e-07	2.4258e-06
sirA	Rv2391	2.2659	10.8299	1.39131e-07	2.6358e-06
	Rv3123	2.34438	7.11864	1.40004e-07	2.64016e-06
	Rv3807c	-2.40354	6.50776	1.47908e-07	2.77648e-06
	Rv0953c	2.39745	6.241	1.52113e-07	2.84244e-06
	Rv1752	-2.78	4.82479	1.66905e-07	3.10474e-06
	Rv1466	2.27162	8.63141	1.72221e-07	3.18919e-06
cysA3	Rv3117	2.24873	10.1114	1.75621e-07	3.23756e-06
lpqA	Rv3016	2.35713	6.48422	1.77778e-07	3.2627e-06
rpmE	Rv1298	2.24402	9.8928	1.88055e-07	3.43597e-06
	Rv2734	2.28441	7.56067	2.16132e-07	3.9315e-06
	Rv0331	2.37398	6.19333	2.21807e-07	4.01695e-06
htpX	Rv0563	2.22937	9.73285	2.25077e-07	4.05829e-06
mmpL10	Rv1183	-2.29077	7.48734	2.26268e-07	4.06196e-06
sseC2	Rv0814c	2.22769	9.81419	2.2804e-07	4.07596e-06
echA19	Rv3516	2.33444	6.48803	2.3706e-07	4.21885e-06
	Rv1996	2.40644	5.69776	2.7527e-07	4.87774e-06
PPE40	Rv2356c	-2.28748	7.14691	2.87804e-07	5.07795e-06
nuoH	Rv3152	-2.25896	7.63707	2.9695e-07	5.19473e-06
	Rv3312A	2.23592	8.01804	2.96368e-07	5.19473e-06
	Rv2050	2.21706	8.85111	3.05636e-07	5.32402e-06
pckA	Rv0211	2.19563	10.6422	3.14134e-07	5.44897e-06
ruvB	Rv2592c	-2.4004	5.92159	3.27632e-07	5.65923e-06
	Rv0307c	2.2806	6.85289	3.36373e-07	5.78589e-06
nuoG	Rv3151	-2.20364	9.2315	3.44526e-07	5.90145e-06
fadE22	Rv3061c	2.25913	7.13322	3.54211e-07	6.04217e-06
	Rv0654	2.25325	7.0576	3.62942e-07	6.16552e-06
cysH	Rv2392	2.19307	9.00863	3.81639e-07	6.45645e-06
PE33	Rv3650	2.56977	4.73184	3.87366e-07	6.52648e-06
	Rv2248	-2.4134	5.68026	4.16951e-07	6.99627e-06
whiB3	Rv3416	2.21669	7.57097	4.29553e-07	7.17842e-06
	Rv2372c	2.17011	8.7107	5.18108e-07	8.62324e-06
	Rv3202c	2.20269	7.36249	5.65949e-07	9.38151e-06
	Rv3005c	-2.18697	7.83464	6.08746e-07	1.00504e-05
lipZ	Rv1834	2.32979	5.69354	6.41863e-07	1.05548e-05
35kd_ag	Rv2744c	2.11933	10.7872	7.36614e-07	1.20646e-05
dnaB	Rv0058	-2.12101	9.04865	8.95706e-07	1.4518e-05
pepR	Rv2782c	-2.19583	6.98701	8.91069e-07	1.4518e-05
	Rv3205c	2.11436	9.24591	8.97002e-07	1.4518e-05
	Rv1584c	2.54429	4.42232	9.31605e-07	1.50189e-05
scpA	Rv1709	-2.19562	6.93126	9.37683e-07	1.50579e-05
lldD1	Rv0694	-2.15106	7.60527	9.70415e-07	1.55229e-05
fdxD	Rv3503c	2.19739	6.44099	1.0419e-06	1.65376e-05
	Rv3527	2.18032	6.70972	1.03947e-06	1.65376e-05
	Rv1463	2.09094	9.03866	1.18484e-06	1.87342e-05
rpsJ	Rv0700	-2.08466	9.50003	1.1923e-06	1.87799e-05
	Rv1892	2.11813	7.54897	1.24907e-06	1.95989e-05
	Rv2455c	2.06682	11.2712	1.29646e-06	2.02653e-05
aftB	Rv3805c	-2.12892	7.42631	1.30888e-06	2.03818e-05
	Rv1150	-2.65689	4.41442	1.4699e-06	2.28029e-05
	Rv1628c	2.10062	7.54904	1.56372e-06	2.41672e-05
gcp	Rv3419c	-2.17519	6.55628	1.59039e-06	2.44872e-05
	Rv3572	2.11534	7.08955	1.61505e-06	2.47741e-05
	Rv3412	2.05216	9.37776	1.66594e-06	2.54598e-05
nuoN	Rv3158	-2.07702	8.1523	1.77087e-06	2.69632e-05
impA	Rv1604	-2.22786	5.94919	1.80236e-06	2.72408e-05
PE23	Rv2328	2.16011	6.21482	1.79824e-06	2.72408e-05
idsB	Rv3383c	2.12983	6.62364	1.87285e-06	2.82025e-05
	Rv2084	-2.17845	6.27034	2.02215e-06	3.03397e-05
	Rv3120	2.06581	7.67767	2.05328e-06	3.06947e-05
	Rv1481	-2.09147	7.30827	2.08763e-06	3.10951e-05
narJ	Rv1163	-2.23689	5.7081	2.38377e-06	3.53779e-05
icl1	Rv0467	2.01197	10.29	2.42587e-06	3.58732e-05
sigE	Rv1221	2.00942	10.7046	2.45347e-06	3.60221e-05
	Rv1944c	2.10224	6.51668	2.4452e-06	3.60221e-05
ccdA	Rv0527	-2.13125	6.41524	2.58547e-06	3.78252e-05
	Rv2567	-2.07923	7.20497	2.6062e-06	3.79932e-05
	Rv2822c	2.14762	6.00677	2.65804e-06	3.86121e-05
	Rv1945	2.05655	7.11871	2.97905e-06	4.31228e-05
rplC	Rv0701	-1.99731	9.71674	2.9926e-06	4.31669e-05
	Rv2646	-2.39274	4.75435	3.10236e-06	4.45937e-05
fadD12	Rv1427c	-2.07194	6.94023	3.23151e-06	4.61457e-05
nuoJ	Rv3154	-2.03827	7.54166	3.23278e-06	4.61457e-05
rpoC	Rv0668	-1.97632	10.4446	3.57172e-06	5.08074e-05
	Rv0047c	-2.08186	6.53789	3.63928e-06	5.159e-05
mce1R	Rv0165c	-2.36739	4.84452	3.70598e-06	5.23549e-05
	Rv2261c	2.34377	4.6678	3.73994e-06	5.26537e-05
	Rv2623	2.32975	4.57424	4.14677e-06	5.81822e-05
nadA	Rv1594	1.95658	10.5271	4.32921e-06	6.05353e-05
	Rv2966c	-2.33471	4.87024	4.37937e-06	6.10291e-05
	Rv1894c	2.04705	6.3616	4.68947e-06	6.51297e-05
	Rv0406c	2.02158	6.86201	4.76154e-06	6.5908e-05
vapB3	Rv0550c	2.13396	5.53306	5.00695e-06	6.90724e-05
	Rv2129c	1.97795	7.75249	5.03568e-06	6.92364e-05
lipP	Rv2463	-1.992	7.59041	5.15805e-06	7.06825e-05
	Rv2694c	1.95061	9.05893	5.20975e-06	7.11538e-05
mog	Rv0865	-2.08634	6.14183	5.31918e-06	7.24078e-05
	Rv1754c	1.97086	7.7697	5.42692e-06	7.36305e-05
ldtA	Rv0116c	1.99749	6.9816	5.45594e-06	7.37809e-05
	Rv0888	2.00155	6.75581	6.13288e-06	8.26632e-05
	Rv0528	-1.99421	7.11038	6.18958e-06	8.31547e-05
	Rv3915	1.92449	9.93618	6.21454e-06	8.32181e-05
trmD	Rv2906c	2.00258	6.62687	6.60004e-06	8.78083e-05
embB	Rv3795	-1.93559	8.68734	6.59243e-06	8.78083e-05
oxyS	Rv0117	2.08525	5.72702	6.7772e-06	8.98744e-05
nuoL	Rv3156	-1.93214	8.7581	6.81501e-06	9.00852e-05
hsaB	Rv3567c	1.99449	6.48717	7.20049e-06	9.48756e-05
	Rv0883c	-1.97539	6.98398	7.81229e-06	0.000102608
	Rv1269c	1.96731	6.89675	7.94481e-06	0.000104016
rplV	Rv0706	-1.93812	7.86773	8.0038e-06	0.000104456
ftsQ	Rv2151c	-1.97066	6.94108	8.21895e-06	0.000106924
corA	Rv1239c	1.93463	7.48092	8.37616e-06	0.000108626
	Rv0572c	1.98723	6.32425	8.80275e-06	0.000113799
mmpL13b	Rv1146	2.01972	5.9593	8.84393e-06	0.000113973
	Rv2262c	2.01028	6.00518	8.87965e-06	0.000114076
	Rv2083	-1.98648	6.65727	9.16631e-06	0.000117392
ino1	Rv0046c	-1.90819	8.39888	9.23353e-06	0.00011752
	Rv3027c	-2.07082	5.75254	9.21108e-06	0.00011752
vapC41	Rv2602	2.01256	5.82569	1.10694e-05	0.000140451
	Rv0264c	1.94016	6.70706	1.12873e-05	0.000142338
	Rv3811	-1.89484	8.20244	1.12582e-05	0.000142338
	Rv1632c	-2.11219	5.30726	1.13292e-05	0.000142429
rplJ	Rv0651	-1.91872	7.32637	1.14092e-05	0.000142998
fusA1	Rv0684	-1.85936	10.5586	1.19519e-05	0.000148892
	Rv3830c	2.04316	5.42067	1.19455e-05	0.000148892
	Rv1772	1.90072	7.39413	1.26677e-05	0.000157332
pks10	Rv1660	1.88984	7.59986	1.28495e-05	0.00015911
truB	Rv2793c	-1.94012	6.66855	1.29627e-05	0.000160029
	Rv1833c	1.95695	6.27934	1.31303e-05	0.000161612
nuoF	Rv3150	-1.86783	8.47794	1.35208e-05	0.000165923
	Rv0793	2.86574	3.14032	1.4617e-05	0.00017831
rpfC	Rv1884c	-1.85816	8.6235	1.46082e-05	0.00017831
	Rv1751	-1.88159	7.66635	1.50872e-05	0.000183502
vapB41	Rv2601A	1.95702	6.00171	1.53496e-05	0.000186143
eccE3	Rv0292	-1.91489	6.78361	1.59748e-05	0.000193154
	Rv1220c	-1.93465	6.4209	1.60573e-05	0.000193582
	Rv0320	2.08832	4.96061	1.62596e-05	0.000195448
murD	Rv2155c	-1.86396	7.82976	1.67817e-05	0.000201135
	Rv0691A	1.83719	8.79261	1.72121e-05	0.000205694
	Rv0311	1.91676	6.22643	1.88408e-05	0.000223898
	Rv3766	1.8321	8.36377	1.88443e-05	0.000223898
rpsS	Rv0705	-1.85164	7.82013	1.90331e-05	0.00022549
wbbL2	Rv1525	-2.10189	5.08334	1.91823e-05	0.000226605
	Rv2304c	2.00931	5.2685	1.94639e-05	0.000229272
	Rv3007c	1.98401	5.5433	2.02191e-05	0.000237487
pknA	Rv0015c	-1.8499	7.52871	2.03745e-05	0.000238632
	Rv3201c	1.88368	6.57468	2.08401e-05	0.000243391
	Rv1287	1.84244	7.49195	2.09903e-05	0.000244451
	Rv2704	-1.96242	5.8035	2.1163e-05	0.000245766
rpoB	Rv0667	-1.79879	11.2492	2.15144e-05	0.000249142
mycP3	Rv0291	-1.83014	8.06175	2.18133e-05	0.000251894
vapC3	Rv0549c	1.88519	6.37267	2.26866e-05	0.000261246
PPE3	Rv0280	-1.98892	5.63893	2.29036e-05	0.000262975
moaE2	Rv0866	-2.07969	4.98597	2.30173e-05	0.000262975
ltp2	Rv3540c	-2.15238	4.72337	2.30287e-05	0.000262975
	Rv2633c	1.81691	8.03983	2.36191e-05	0.00026897
	Rv3064c	2.04854	4.92891	2.39429e-05	0.000271904
rpsQ	Rv0710	-1.81342	8.31422	2.43061e-05	0.000275269
atpG	Rv1309	-1.8087	8.57619	2.44151e-05	0.000275743
lpqZ	Rv1244	-1.94043	5.80781	2.47008e-05	0.000278205
	Rv3427c	-2.25855	4.32411	2.51861e-05	0.000282896
lpqH	Rv3763	1.78268	10.6547	2.54465e-05	0.000285042
	Rv2989	1.80926	7.83672	2.61811e-05	0.000292475
aftD	Rv0236c	-1.81983	7.60091	2.74665e-05	0.000306002
vapC33	Rv1242	-1.98186	5.53083	2.77674e-05	0.000308519
	Rv3542c	-2.15893	4.56575	2.79149e-05	0.000309321
	Rv3668c	1.82219	7.24525	2.80586e-05	0.000310077
stp	Rv2333c	1.85944	6.40837	2.89683e-05	0.000319272
cysA1	Rv2397c	1.8142	7.32649	2.94869e-05	0.00032412
	Rv0010c	-1.99313	5.4003	3.01452e-05	0.00032989
yrbE3A	Rv1964	2.04114	4.67814	3.01724e-05	0.00032989
rplP	Rv0708	-1.78932	8.27072	3.06669e-05	0.000334408
xseB	Rv1107c	-1.90382	6.01566	3.07809e-05	0.000334763
yfiH	Rv2149c	-1.8465	6.70852	3.2623e-05	0.000353861
lipO	Rv1426c	-1.91381	5.89027	3.32313e-05	0.000359379
whiB2	Rv3260c	1.75657	10.2136	3.33619e-05	0.000359379
PE36	Rv3893c	1.80196	7.34501	3.3394e-05	0.000359379
hemB	Rv0512	-1.82969	6.82057	3.35432e-05	0.000360042
lprJ	Rv1690	1.80358	7.20043	3.38656e-05	0.000362556
	Rv1891	1.7725	8.32214	3.41603e-05	0.000364761
rplL	Rv0652	-1.80748	7.26144	3.47983e-05	0.00037061
	Rv0997	-1.78943	7.67784	3.56782e-05	0.000379
	Rv2275	-1.84247	6.46923	3.61264e-05	0.000382772
desA3	Rv3229c	1.77183	8.07515	3.65422e-05	0.000386182
	Rv2681	-1.81614	6.85914	3.75541e-05	0.000395858
	Rv2821c	1.83566	6.35288	3.7783e-05	0.000397253
cut5b	Rv3724B	1.82033	6.54169	3.93112e-05	0.000412267
	Rv1148c	1.7746	7.57756	3.96572e-05	0.000414836
rplW	Rv0703	-1.75229	8.85124	3.99093e-05	0.000416414
prpC	Rv1131	1.7521	8.51685	4.07042e-05	0.000423633
	Rv1036c	2.08671	4.37797	4.09524e-05	0.000425139
chaA	Rv1607	-1.90928	5.57648	4.10857e-05	0.000425449
hsdM	Rv2756c	-1.91024	5.69585	4.17021e-05	0.000430747
ribC	Rv1412	1.79125	6.94014	4.19498e-05	0.00043222
esxR	Rv3019c	2.54817	3.15569	4.24015e-05	0.000435781
	Rv3230c	1.76451	7.56978	4.35234e-05	0.000446196
rskA	Rv0444c	-1.7798	7.27593	4.44958e-05	0.00045503
	Rv0877	1.73532	9.00808	4.47424e-05	0.000456417
	Rv0326	2.03567	4.60555	4.61096e-05	0.000469199
	Rv2128	-1.84236	6.13895	4.63367e-05	0.000470346
echA2	Rv0456c	1.86035	5.691	4.64867e-05	0.000470707
	Rv1727	2.32472	3.58353	4.83045e-05	0.000487911
pcp	Rv0319	1.82392	5.93535	4.98793e-05	0.000501354
	Rv1669	2.75103	2.88321	4.98313e-05	0.000501354
purT	Rv0389	1.77307	6.84475	5.04678e-05	0.000506032
	Rv3528c	1.73484	8.05487	5.12251e-05	0.000512376
rplB	Rv0704	-1.71795	9.35442	5.15412e-05	0.000513304
hisF	Rv1605	-1.84175	6.03827	5.16925e-05	0.000513304
nrdF2	Rv3048c	1.73762	7.8956	5.1665e-05	0.000513304
	Rv0059	-1.8802	5.62618	5.33209e-05	0.000525864
carB	Rv1384	-1.75718	7.40659	5.31992e-05	0.000525864
	Rv2819c	1.78702	6.37932	5.33411e-05	0.000525864
fusA2	Rv0120c	1.72688	8.2062	5.35786e-05	0.000526942
hemD	Rv0511	-1.73072	8.27131	5.38409e-05	0.000528258
parA	Rv3918c	-1.84704	5.95318	5.45785e-05	0.00053422
nudC	Rv3199c	-1.77197	6.8725	5.50502e-05	0.000537557
	Rv0465c	1.71655	8.70621	5.56045e-05	0.000541682
pyrF	Rv1385	-1.94589	5.14221	5.58796e-05	0.000543076
hemC	Rv0510	-1.72333	8.28285	5.72288e-05	0.000554876
whiB1	Rv3219	1.69504	11.9363	5.82725e-05	0.000563666
	Rv1716	-2.63339	3.28684	5.93391e-05	0.000572636
	Rv1531	1.75666	6.80613	6.04739e-05	0.000580921
	Rv2599	-1.99455	4.83451	6.04802e-05	0.000580921
	Rv3258c	-1.74454	7.28382	6.10696e-05	0.000583853
	Rv3735	1.73326	7.35093	6.09949e-05	0.000583853
rodA	Rv0017c	-1.76517	6.73024	6.29481e-05	0.000599027
hsaC	Rv3568c	1.72894	7.50712	6.28597e-05	0.000599027
frdB	Rv1553	2.71161	2.85102	6.40322e-05	0.000607936
	Rv0077c	1.95922	4.64671	6.42145e-05	0.000608262
PPE7	Rv0354c	1.99323	4.53681	6.55758e-05	0.000619729
cyp139	Rv1666c	-1.95489	5.0793	6.6295e-05	0.000625089
lpqJ	Rv0344c	-2.21191	4.13501	6.75932e-05	0.000635871
metA	Rv3341	1.71214	7.81375	6.80109e-05	0.000638339
	Rv1804c	2.27418	3.54313	6.83045e-05	0.000639635
	Rv0688	1.695	8.61202	6.87913e-05	0.00064273
hsdS	Rv2761c	-1.81283	5.88946	7.03683e-05	0.000655973
	Rv2303c	1.85164	5.27019	7.06595e-05	0.000657198
	Rv2102	-1.76168	6.48185	7.23602e-05	0.000669962
	Rv2893	1.92219	4.82953	7.25208e-05	0.000669962
	Rv3136A	1.81074	5.76786	7.2247e-05	0.000669962
	Rv1816	-1.74283	6.76354	7.43164e-05	0.000684091
helZ	Rv2101	-1.68715	8.76094	7.4383e-05	0.000684091
eccD3	Rv0290	-1.70278	7.7934	7.54421e-05	0.000692283
	Rv2695	1.789	5.85785	7.58163e-05	0.000694166
	Rv3387	-2.50046	3.51068	7.64132e-05	0.000698077
	Rv0749A	1.83724	5.42849	7.73725e-05	0.000705273
rmlB	Rv3464	1.67004	9.58661	7.85938e-05	0.000714821
	Rv1048c	1.79902	5.75882	7.88944e-05	0.000715971
	Rv1510	1.7496	6.30508	7.93239e-05	0.000718283
	Rv1765A	2.40508	3.2723	7.99597e-05	0.000720441
aroE	Rv2552c	-1.80413	5.80519	8.00879e-05	0.000720441
topA	Rv3646c	-1.68481	8.49544	8.00292e-05	0.000720441
mmpL13a	Rv1145	1.91021	4.87542	8.1069e-05	0.000727674
	Rv1052	1.76674	5.96395	8.33277e-05	0.000746318
	Rv2927c	-1.68235	8.29869	8.36994e-05	0.000748018
	Rv0374c	2.12428	4.02517	8.44412e-05	0.000752329
	Rv1766	1.79598	5.61091	8.45478e-05	0.000752329
	Rv2762c	-1.82309	5.65085	8.58441e-05	0.000762214
atpH	Rv1307	-1.65744	9.80244	8.8621e-05	0.000785175
	Rv2417c	-1.73985	6.5012	8.91638e-05	0.000788285
	Rv3282	-1.75139	6.3731	8.96594e-05	0.000790965
	Rv0791c	1.79351	5.66902	9.12548e-05	0.000803316
drrA	Rv2936	-1.72798	6.72212	9.25429e-05	0.000812914
	Rv3502c	1.70477	6.72656	9.74835e-05	0.000854488
gyrA	Rv0006	-1.64672	9.71373	9.83946e-05	0.000859132
ruvA	Rv2593c	-1.82125	5.48334	9.84313e-05	0.000859132
murC	Rv2152c	-1.68698	7.32057	0.0001034	0.000900587
nuoE	Rv3149	-1.66205	8.13333	0.000104535	0.000908546
	Rv1514c	-1.96815	4.72428	0.000105189	0.0009123
thiO	Rv0415	1.67779	7.18351	0.000106135	0.000915269
mce2A	Rv0589	-1.71929	6.44943	0.000106644	0.000915269
lpqQ	Rv0835	1.69857	6.68775	0.000105944	0.000915269
pepE	Rv2089c	1.7669	5.70619	0.000106549	0.000915269
	Rv3174	2.67108	2.81815	0.000106371	0.000915269
	Rv0373c	1.72052	6.24542	0.000107089	0.000917177
	Rv0421c	-1.79855	5.56313	0.000112295	0.000959759
	Rv1708	-1.67827	7.2053	0.000114172	0.000973776
gpsI	Rv2783c	-1.63074	9.34068	0.000116776	0.000993925
	Rv2680	-1.6878	6.85408	0.000118116	0.00100325
fcoT	Rv0098	-1.81652	5.34812	0.000118504	0.00100447
	Rv1271c	-2.81694	2.99929	0.000118807	0.00100497
ndh	Rv1854c	1.62992	8.61607	0.000123705	0.00104426
	Rv1571	-2.03737	4.35014	0.000124243	0.00104665
embA	Rv3794	-1.63061	8.66403	0.000126284	0.00106166
	Rv0597c	-1.72518	6.12736	0.000127204	0.00106722
	Rv1473	1.6231	8.8812	0.000129264	0.00108229
	Rv1035c	1.85581	4.83333	0.000129655	0.00108336
rpmC	Rv0709	-1.63398	8.22173	0.000130257	0.00108618
	Rv3832c	1.91713	4.51289	0.00013119	0.00109175
adoK	Rv2202c	1.61352	9.48903	0.000133456	0.00110836
	Rv1491c	-1.70773	6.24536	0.000134012	0.00111073
secE2	Rv0379	-1.66795	6.91821	0.000135406	0.00112003
mce2B	Rv0590	-1.71018	6.23322	0.000138156	0.00113819
eccE2	Rv3885c	-1.66924	6.9106	0.000138059	0.00113819
engA	Rv1713	-1.67323	6.82483	0.000139728	0.00114845
	Rv1990c	1.70859	6.03306	0.00013996	0.00114845
	Rv2765	1.76639	5.33811	0.000141287	0.00115703
pcd	Rv3293	-1.66184	6.90499	0.000146709	0.00119856
	Rv3837c	1.60515	9.15585	0.000146941	0.00119856
	Rv2799	1.64506	7.04815	0.000148101	0.00120563
ruvC	Rv2594c	-1.72683	5.89719	0.000149038	0.00121086
fadE12	Rv0972c	-1.87996	4.78829	0.000150705	0.00122199
	Rv0158	-1.76526	5.58389	0.000152477	0.00123392
rpfD	Rv2389c	1.70858	5.80921	0.000154587	0.00124854
	Rv1567c	1.73251	5.46748	0.000159453	0.00128532
phoT	Rv0820	-1.74269	5.63336	0.000160394	0.00128785
	Rv1049	1.72439	5.60142	0.000160306	0.00128785
cut2	Rv2301	1.61168	7.85377	0.000165301	0.00132466
mce1A	Rv0169	-1.60168	8.58613	0.00016773	0.00134151
menE	Rv0542c	-1.64412	6.92564	0.000168957	0.0013487
fadD24	Rv1529	1.62218	7.2215	0.000173106	0.00137915
ctpD	Rv1469	1.62076	7.14043	0.000176763	0.00140285
cobB	Rv2848c	-1.7379	5.60783	0.000176434	0.00140285
	Rv1405c	2.03865	3.8445	0.000183518	0.00145364
rpsA	Rv1630	-1.57597	10.0547	0.000184913	0.00146188
pknB	Rv0014c	-1.59971	7.89397	0.00018864	0.00148801
	Rv0692	1.5766	9.26598	0.000188943	0.00148801
moxR2	Rv3692	-1.63244	6.95009	0.000189719	0.00149127
moaC2	Rv0864	-1.59418	8.12201	0.000190886	0.00149758
nrdH	Rv3053c	1.56978	10.4309	0.000191556	0.00149997
mez	Rv2332	1.60978	7.18445	0.00019463	0.00152114
	Rv0227c	-1.58576	8.35856	0.000197354	0.00153951
lprA	Rv1270c	1.59431	7.70532	0.000199458	0.00155298
tuf	Rv0685	-1.55923	10.2676	0.000213202	0.00165685
	Rv2086	-3.41562	2.34703	0.000214972	0.00166745
PPE32	Rv1808	1.58391	7.64496	0.000216204	0.00167071
recG	Rv2973c	-1.78077	5.14511	0.000216085	0.00167071
	Rv0945	-1.69901	5.74473	0.000218076	0.00168201
clpP2	Rv2460c	1.55702	9.84528	0.000218932	0.00168244
hpx	Rv3171c	-1.66132	6.13877	0.000218951	0.00168244
alkA	Rv1317c	1.58742	7.40788	0.000221189	0.00169647
mazE2	Rv0660c	-1.58049	7.9691	0.00022235	0.0017022
	Rv2624c	2.23674	3.24213	0.00022797	0.00173875
fadA5	Rv3546	1.6028	6.90226	0.000227588	0.00173875
	Rv3690	-1.67723	5.78602	0.000235491	0.00179278
	Rv0257	1.87349	4.25337	0.000239681	0.00182131
	Rv2075c	1.60884	6.58511	0.000240442	0.00182372
PPE17	Rv1168c	1.56669	7.96261	0.000242392	0.00183513
	Rv2336	1.57926	7.23883	0.000248252	0.00187259
cspA	Rv3648c	-1.54472	9.72232	0.000248215	0.00187259
	Rv1505c	-1.75525	5.06204	0.000249746	0.00188042
	Rv0776c	1.80086	4.61913	0.000251613	0.00188756
	Rv2632c	1.56734	7.61576	0.000251217	0.00188756
	Rv0621	1.69646	5.24821	0.000253749	0.00190011
moeW	Rv2338c	1.57453	7.28316	0.00025647	0.001917
nuoK	Rv3155	-1.60607	6.65	0.00025986	0.00193881
rplD	Rv0702	-1.54174	9.32472	0.000260683	0.00194143
cysK1	Rv2334	1.54091	9.14878	0.000261583	0.00194461
	Rv2474c	-1.75536	5.12577	0.000262367	0.00194692
	Rv2407	1.86577	4.28764	0.000265989	0.00197024
thrA	Rv1294	-1.55335	8.14414	0.000268794	0.00198743
	Rv2532c	-1.69045	5.54964	0.000273854	0.00202121
amiA2	Rv2363	-1.61832	6.38522	0.000276332	0.00203585
	Rv3691	-1.6217	6.19428	0.000278629	0.0020491
bkdB	Rv2496c	1.53229	9.01455	0.00028469	0.00208993
mshD	Rv0819	-1.59816	6.63406	0.000286534	0.00209972
	Rv3032A	-1.86445	4.39221	0.000291081	0.00212924
rplO	Rv0723	-1.53786	8.53324	0.000292528	0.00213602
	Rv2636	1.68346	5.29336	0.000296846	0.00216371
amiC	Rv2888c	-1.54359	7.9996	0.000301777	0.00219576
rpsC	Rv0707	-1.53131	8.81829	0.000303117	0.00220162
	Rv0891c	-1.68726	5.38127	0.000305076	0.00221194
mmpL9	Rv2339	-1.56067	7.25145	0.000306533	0.00221858
phoH2	Rv1095	-1.53635	8.19223	0.000310104	0.00224049
	Rv1990A	1.89073	3.99902	0.000313835	0.00226005
	Rv3633	1.51673	9.75746	0.000313911	0.00226005
pip	Rv0840c	1.80292	4.42542	0.000315719	0.00226909
	Rv3831	1.62198	5.83052	0.000318604	0.00228583
	Rv0188	1.52985	8.2215	0.000320394	0.00229068
canB	Rv3588c	1.516	9.44247	0.000320388	0.00229068
MTS1338	RVnc0036	1.61929	5.89875	0.000321816	0.00229685
mbtG	Rv2378c	-1.818	4.65398	0.000324528	0.00231219
	Rv0605	1.58942	6.26485	0.000333062	0.00236889
thrC	Rv1295	-1.53621	7.6441	0.000340837	0.00242
	Rv0045c	-1.56965	6.74702	0.000347471	0.00245861
	Rv3221c	1.54559	7.17795	0.000346938	0.00245861
	Rv2423	1.58245	6.12237	0.000356922	0.00252115
rplF	Rv0719	-1.51603	8.41709	0.000358469	0.00252549
	Rv0802c	1.63391	5.5626	0.000358766	0.00252549
trxA	Rv1470	1.61637	5.6478	0.000361056	0.00253727
	Rv0088	-1.56623	6.73529	0.000364523	0.00254856
	Rv2082	-1.53784	7.3457	0.000363994	0.00254856
	Rv2267c	-1.71639	5.09624	0.000363318	0.00254856
cdd	Rv3315c	1.65616	5.30837	0.000366417	0.00255745
mmpL7	Rv2942	-1.51112	8.6574	0.000367045	0.00255749
	Rv2040c	-1.87334	4.28436	0.000368252	0.00256156
panB	Rv2225	-1.5809	6.32058	0.000374529	0.00260082
tesB1	Rv1618	-1.5205	7.88447	0.000381224	0.00264285
argD	Rv1655	-1.59178	6.1299	0.000391784	0.00271149
	Rv2405	1.52132	7.34285	0.000400754	0.00276426
	Rv3530c	1.64237	5.2445	0.000400411	0.00276426
pknD	Rv0931c	-1.48964	9.64074	0.000403518	0.00277867
mazE5	Rv1943c	1.54676	6.61457	0.000406179	0.00279231
	Rv2672	1.49463	8.79119	0.00040929	0.002809
	Rv2816c	1.81636	4.25007	0.000410666	0.00281374
lppQ	Rv2341	2.21887	2.89596	0.000411667	0.00281591
pyrD	Rv2139	-1.52611	7.25126	0.000412712	0.00281837
pks6	Rv0405	-1.52313	7.32286	0.000417746	0.0028433
recN	Rv1696	-1.54007	6.75226	0.000417569	0.0028433
	Rv0076c	1.71353	4.75193	0.000423826	0.00287901
	Rv2820c	1.57963	5.92524	0.000424393	0.00287901
	Rv2645	-1.68659	5.01017	0.000431017	0.00291913
espC	Rv3615c	1.47944	9.7081	0.000434912	0.00294066
	Rv1947	-1.6992	4.98676	0.000437125	0.00294594
murG	Rv2153c	-1.52652	7.06308	0.000436515	0.00294594
rpsI	Rv3442c	-1.50386	7.85585	0.00043963	0.00295797
panC	Rv3602c	-1.59638	5.81675	0.0004404	0.00295831
sigB	Rv2710	1.47278	11.3007	0.000443289	0.00297286
	Rv3337	1.5543	6.18541	0.000453124	0.00303386
	Rv1702c	-1.93225	3.99453	0.000460932	0.00308113
PE32	Rv3622c	2.59357	2.37253	0.000466301	0.00311195
	Rv3254	1.50377	7.25615	0.000467527	0.00311508
	Rv3200c	-1.51889	7.07175	0.000470613	0.00313056
	Rv2390c	1.60222	5.40196	0.000475337	0.00315688
	Rv3031	-1.54938	6.29716	0.000487165	0.00323022
lppP	Rv2330c	1.75075	4.31475	0.000489059	0.00323755
accA2	Rv0973c	-1.7454	4.64291	0.000492926	0.00325791
	Rv3575c	-1.56931	5.99477	0.000502529	0.00331604
vapC6	Rv0656c	1.72077	4.55868	0.000512707	0.00337111
argH	Rv1659	-1.57285	5.91813	0.000512184	0.00337111
	Rv3541c	-2.22882	3.14121	0.000513333	0.00337111
cobN	Rv2062c	-1.48119	8.01651	0.000514503	0.0033734
	Rv3108	-6.75865	1.41027	0.000517265	0.00338611
	Rv2456c	-1.53199	6.49146	0.00052046	0.00340161
ribD	Rv2671	-1.73488	4.54556	0.000523438	0.00341564
	Rv1972	1.83027	3.95326	0.000524355	0.0034162
papA5	Rv2939	1.48706	7.44739	0.000525209	0.00341635
guaA	Rv3396c	-1.49347	7.28894	0.000527505	0.00342587
nrdI	Rv3052c	1.45368	10.3933	0.000530844	0.00344211
nusB	Rv2533c	-1.52006	6.5558	0.000532176	0.00344532
pks3	Rv1180	1.46242	8.83934	0.000537838	0.0034765
	Rv0274	1.53338	6.04712	0.000547314	0.00353219
	Rv2160c	1.46141	8.57231	0.000550059	0.00354435
lppI	Rv2046	1.48688	7.08856	0.000553773	0.0035627
hsaF	Rv3534c	1.49828	6.78461	0.000560208	0.00359846
lpqV	Rv1064c	1.59508	5.36437	0.000564798	0.00362229
fadE35	Rv3797	1.53044	6.1311	0.00058075	0.00371879
proC	Rv0500	-1.50909	6.66507	0.000582778	0.00372597
hsaA	Rv3570c	1.46098	8.05259	0.000584874	0.00373356
vapB42	Rv2760c	-1.73409	4.49807	0.000587317	0.00374335
rpmJ	Rv3461c	1.44001	10.4055	0.000595998	0.0037928
	Rv2469c	1.56289	5.53863	0.000600488	0.00381546
PPE41	Rv2430c	-1.47125	7.50135	0.00060504	0.00383845
rplM	Rv3443c	-1.45482	8.16481	0.000618366	0.00391695
kstD	Rv3537	1.48931	6.59881	0.000625681	0.00395719
	Rv2600	-1.5401	5.9261	0.000628053	0.00396609
typA	Rv1165	-1.4937	6.80519	0.000632353	0.00398712
	Rv2366c	-1.48868	6.82664	0.000633421	0.00398774
	Rv1006	-1.45148	8.17523	0.000641241	0.0040308
kdpB	Rv1030	-1.59328	5.40808	0.000642264	0.00403106
fadD9	Rv2590	1.43551	9.24695	0.00064527	0.00404376
	Rv0804	-1.58249	5.55567	0.000651267	0.00407512
rpsL	Rv0682	-1.44469	8.46199	0.000653451	0.00408258
	Rv1433	-1.5281	6.09681	0.000659797	0.00411597
	Rv0911	-1.61689	5.11206	0.000661251	0.00411879
	Rv0544c	-1.47845	6.9539	0.000664417	0.00413225
	Rv2943A	-1.93107	3.74677	0.000676858	0.00419693
nuoC	Rv3147	-1.45813	7.59621	0.000676255	0.00419693
PE_PGRS18	Rv0980c	1.61814	4.90173	0.000679977	0.00420359
	Rv2475c	-1.54995	5.74646	0.000679708	0.00420359
	Rv2164c	-1.46256	7.2602	0.000694359	0.00428605
	Rv3032	-1.49912	6.45647	0.000696694	0.00429221
	Rv3058c	1.43817	8.18647	0.000697446	0.00429221
	Rv1711	-1.51528	6.19573	0.000699163	0.00429635
	Rv2307B	1.86685	3.65329	0.000700863	0.00430037
vapB33	Rv1241	-1.49102	6.5242	0.00070349	0.00431006
	Rv1904	1.43682	8.03732	0.000720942	0.00441041
	Rv0089	-1.6724	4.75168	0.000724588	0.00441956
	Rv0177	-1.4363	8.16415	0.000724138	0.00441956
PPE18	Rv1196	-1.41601	10.3239	0.000734888	0.00447574
	Rv0042c	-1.46341	6.95044	0.000752106	0.00457383
vapC25	Rv0277c	-1.50846	6.13755	0.000760624	0.00461879
	Rv1882c	-1.50271	6.18648	0.000767241	0.00464856
	Rv3707c	-1.48754	6.40411	0.000767787	0.00464856
	Rv3491	1.43755	7.55027	0.000770039	0.00465534
	Rv1233c	-1.45544	6.98177	0.00077896	0.00470236
yrbE1B	Rv0168	-1.44576	7.27797	0.000782148	0.00470777
	Rv3362c	-1.53837	5.71964	0.000781845	0.00470777
	Rv1151c	1.51849	5.69269	0.00079351	0.00476222
PPE69	Rv3892c	1.44427	7.05742	0.000793433	0.00476222
	Rv1498A	1.43875	7.2823	0.000797199	0.00477738
	Rv1342c	1.46902	6.43144	0.000800868	0.00479238
ndhA	Rv0392c	1.44201	7.11537	0.000807725	0.00482639
mshA	Rv0486	1.41434	8.66445	0.000809306	0.00482882
mpr6	RVnc0033a	1.43912	7.23796	0.000812074	0.00483831
	Rv2513	-1.53961	5.50274	0.0008146	0.00484634
	Rv2658c	1.51941	5.5067	0.000840346	0.00499229
pptT	Rv2794c	-1.4808	6.25897	0.00084372	0.0050051
pstA1	Rv0930	-1.52095	5.7785	0.000856764	0.00506785
che1	Rv2393	1.42756	7.37815	0.000855588	0.00506785
argF	Rv1656	-1.51874	5.74148	0.000860437	0.00508226
rplR	Rv0720	-1.41019	8.34789	0.000883131	0.00520882
dsbF	Rv1677	1.4035	8.3732	0.000908379	0.00535006
	Rv2652c	1.63747	4.4661	0.000909997	0.00535193
rplE	Rv0716	-1.4033	8.52797	0.000912716	0.00535946
fadE27	Rv3505	1.44489	6.66185	0.000913886	0.00535946
	Rv1825	-1.47411	6.27841	0.000917456	0.00536741
snoP	Rv2604c	-1.47437	6.15261	0.000917852	0.00536741
	Rv1576c	-1.61912	4.85876	0.0009307	0.00543481
PPE33	Rv1809	1.39137	8.96451	0.000945186	0.00551157
	Rv3748	-1.58246	5.02691	0.000954512	0.00555807
nrdR	Rv2718c	1.40456	7.77256	0.000958037	0.00557071
thiS	Rv0416	1.65818	4.38514	0.000974212	0.00565676
	Rv0225	-1.43	7.04176	0.000975603	0.00565684
	Rv2731	1.39602	8.16862	0.000984591	0.00570092
	Rv2035	1.47017	5.89874	0.000991175	0.0057223
clpP1	Rv2461c	1.38419	9.14173	0.000992459	0.0057223
	Rv3771c	-1.74061	4.18385	0.000992022	0.0057223
mmpL8	Rv3823c	-1.40524	7.68176	0.000994544	0.00572629
	Rv0157A	1.43685	6.48632	0.000997344	0.00573309
clpC2	Rv2667	1.82578	3.56021	0.000998515	0.00573309
narI	Rv1164	-1.54762	5.32656	0.00102057	0.00585152
fadD7	Rv0119	1.40792	7.25993	0.00102486	0.00586797
	Rv0760c	-1.40947	7.39842	0.00103348	0.00590911
	Rv0178	-1.38698	8.55478	0.00104542	0.00594564
	Rv1780	-1.47258	5.95407	0.00104199	0.00594564
nuoD	Rv3148	-1.38631	8.53512	0.00104657	0.00594564
	Rv3591c	1.57439	4.72623	0.00104516	0.00594564
	Rv3828c	1.44909	6.1529	0.0010471	0.00594564
nagA	Rv3332	-1.52022	5.37742	0.00106385	0.00603242
mazF2	Rv0659c	-1.39493	7.85607	0.0010662	0.00603737
galE3	Rv0536	1.46615	5.75127	0.00109286	0.00617984
mrsA	Rv3441c	-1.38222	8.30805	0.00109982	0.00621066
	Rv2309A	1.89308	3.40504	0.00110661	0.00623187
amiD	Rv3375	-1.51762	5.42096	0.00110583	0.00623187
cobO	Rv2849c	-1.48003	5.83335	0.0011129	0.00625875
pks17	Rv1663	-1.72506	4.04778	0.00112746	0.00633194
canA	Rv1284	1.4025	6.95518	0.00114447	0.00640998
helY	Rv2092c	-1.42024	6.75998	0.00114341	0.00640998
ppsE	Rv2935	-1.3927	7.46974	0.00114671	0.00641378
	Rv3376	-1.38313	7.74292	0.00117919	0.00658648
	Rv1573	-2.49356	2.46244	0.00118483	0.00660901
	Rv0223c	1.40347	6.73864	0.00118915	0.00662412
	Rv0176	-1.37879	7.79305	0.00121477	0.00675769
	Rv0998	-1.40206	6.88306	0.0012172	0.00676206
vapC46	Rv3384c	-1.55411	4.91168	0.00122127	0.00677552
argB	Rv1654	-1.43193	6.27161	0.00122993	0.00681435
	Rv1732c	1.36895	8.1018	0.0012333	0.00682381
	Rv0063	-1.42072	6.34422	0.00124339	0.00687038
	Rv2242	-1.41445	6.48875	0.00125262	0.00691214
	Rv0200	-1.40202	6.79636	0.00126328	0.0069616
glfT2	Rv3808c	-1.3639	8.39556	0.00126502	0.00696182
	Rv1610	-1.41366	6.4367	0.00127631	0.00701456
mce1C	Rv0171	-1.35288	9.33172	0.00128019	0.00702651
	Rv0606	1.38798	7.06273	0.0012834	0.00703473
	Rv0057	-1.38502	7.0968	0.00130961	0.00716883
lprC	Rv1275	1.35538	8.51837	0.00132986	0.00725076
cyp125	Rv3545c	1.38138	6.98833	0.00132938	0.00725076
ispD	Rv3582c	-1.36168	8.17887	0.00132836	0.00725076
PPE2	Rv0256c	-1.39797	6.71842	0.00134714	0.0073352
mobA	Rv2453c	1.36043	7.77391	0.00135916	0.00739089
PE_PGRS31	Rv1768	-1.39605	6.64692	0.00136866	0.00742292
	Rv1810	1.34827	8.7865	0.00136835	0.00742292
panD	Rv3601c	-1.44253	5.90166	0.00138649	0.00750969
pbpB	Rv2163c	-1.36338	7.76984	0.00139438	0.0075326
	Rv3060c	1.37586	7.02192	0.00139286	0.0075326
	Rv0541c	-1.45958	5.54725	0.00140592	0.007575
pcnA	Rv3907c	-1.40513	6.53172	0.00140586	0.007575
glf	Rv3809c	-1.38451	6.82376	0.00142861	0.00768718
	Rv1954c	1.68895	3.98769	0.0014358	0.0077122
	Rv3114	-6.56791	1.26403	0.00143701	0.0077122
	Rv0862c	-1.40159	6.37458	0.00144842	0.0077633
vapC21	Rv2757c	-1.71315	4.10246	0.00145727	0.00780058
	Rv0822c	1.34828	7.99448	0.00146391	0.0078259
	Rv0192A	1.37427	6.78467	0.00147006	0.0078388
	Rv1941	-1.58804	4.5682	0.00147013	0.0078388
	Rv2411c	1.34204	8.30668	0.00149176	0.0079438
	Rv2190c	-1.33258	9.47371	0.00149519	0.00795179
	Rv1870c	-1.35311	7.73379	0.00150648	0.00800149
rpsH	Rv0718	-1.33385	8.96707	0.00152106	0.00806847
	Rv0361	1.33833	8.37697	0.00152932	0.00809144
ackA	Rv0409	-1.39685	6.40343	0.00152808	0.00809144
pth	Rv1014c	-1.45925	5.56677	0.00154283	0.00815133
	Rv1474c	-1.44849	5.65386	0.00154461	0.00815133
	Rv2850c	-1.35378	7.5678	0.0015582	0.00821249
PE_PGRS25	Rv1396c	-1.37162	6.93563	0.00157313	0.0082806
mpt64	Rv1980c	-1.32664	9.27134	0.00158252	0.00831937
aglA	Rv2471	-1.37381	6.80814	0.00159237	0.00836045
lprD	Rv1343c	1.37661	6.53672	0.00160339	0.00840756
	Rv0199	-1.44385	5.65049	0.00161221	0.00844304
	Rv3723	-1.34208	7.75861	0.00163691	0.0085615
lppB	Rv2544	-2.71708	2.2822	0.0016487	0.0086122
ilvC	Rv3001c	-1.34144	7.6314	0.00165645	0.00864168
vapB21	Rv2758c	-1.73459	3.76775	0.00168007	0.00875382
	Rv2743c	1.31641	9.1027	0.00171273	0.0089127
	Rv1535	-1.37975	6.38043	0.0017653	0.00917466
	Rv2160A	1.31248	9.06218	0.00177001	0.00918743
cut3	Rv3451	1.39888	5.78238	0.00177223	0.00918743
nmtR	Rv3744	1.46151	5.01818	0.00178293	0.00923129
argU	Rvnt43	1.37442	6.19259	0.00179587	0.00928655
PE13	Rv1195	-1.30974	9.37153	0.0017989	0.00929056
esxD	Rv3891c	1.31862	8.15681	0.0018099	0.00933566
	Rv0546c	-1.42983	5.64033	0.00183361	0.00944608
	Rv3226c	1.358	6.52341	0.00184843	0.00951049
fgd2	Rv0132c	1.42689	5.25805	0.00185666	0.00954093
speE	Rv2601	-1.43432	5.42586	0.00187525	0.00962441
	Rv2807	1.71279	3.47742	0.00189671	0.00972241
dinF	Rv2836c	-1.399	5.87018	0.00192919	0.00987661
	Rv3479	-1.31321	8.06581	0.00193849	0.00991187
	Rv3090	1.39039	5.70835	0.00197273	0.0100744
atpD	Rv1310	-1.29757	9.37325	0.00197807	0.0100891
	Rv1112	-1.56198	4.50641	0.00199646	0.0101577
kasB	Rv2246	-1.29346	9.9865	0.00199622	0.0101577
	Rv1815	-1.3144	7.84411	0.00202418	0.010286
mazE3	Rv1103c	1.32001	7.1929	0.00205148	0.0104119
cydD	Rv1621c	-1.474	4.88529	0.00206502	0.0104419
ctpF	Rv1997	1.45037	4.86785	0.00206502	0.0104419
	Rv2618	1.70668	3.5352	0.00206432	0.0104419
	Rv0460	-1.39095	5.86439	0.00207663	0.0104878
fadE1	Rv0131c	1.32817	6.84679	0.00209253	0.0105551
rpfA	Rv0867c	-1.29279	8.82549	0.00211593	0.01066
nuoI	Rv3153	-1.30477	7.8335	0.00212739	0.0107046
	Rv0607	1.48087	4.60748	0.00214422	0.0107368
	Rv1419	1.32546	6.9436	0.00214354	0.0107368
	Rv2862c	1.4042	5.35051	0.00214257	0.0107368
cyp142	Rv3518c	1.30615	7.6681	0.00214087	0.0107368
	Rv2884	1.33114	6.52361	0.00217514	0.0108783
PPE54	Rv3343c	-1.33798	6.65813	0.0022058	0.0110183
	Rv1765c	1.33805	6.28506	0.00221533	0.0110525
	Rv0825c	1.32382	6.65861	0.00222587	0.0110916
drrC	Rv2938	-1.41756	5.39223	0.00223799	0.0111385
atpC	Rv1311	-1.30405	7.65252	0.00224397	0.0111547
	Rv2446c	-1.41078	5.32076	0.00227296	0.0112852
PPE6	Rv0305c	1.30458	7.31569	0.00227941	0.0112952
	Rv3047c	1.43353	5.03634	0.00228046	0.0112952
rpmF	Rv0979A	-1.34123	6.37411	0.00228677	0.0113128
	Rv3013	-1.64421	4.05131	0.00231248	0.0114262
ogt	Rv1316c	1.31012	6.97039	0.00232043	0.0114471
birA	Rv3279c	1.33851	6.20755	0.00232227	0.0114471
	Rv1272c	-1.38015	5.6762	0.00233857	0.0115136
	Rv2954c	1.28044	8.6931	0.00234216	0.0115175
atpF	Rv1306	-1.27261	9.31095	0.00240582	0.0118164
tig	Rv2462c	-1.27562	8.85419	0.00240996	0.0118226
rpsG	Rv0683	-1.27167	9.07334	0.00245211	0.0120151
	Rv2015c	1.30176	7.00571	0.0024944	0.0121932
cut5a	Rv3724A	1.33257	6.11258	0.00249198	0.0121932
bisC	Rv1442	1.27342	8.40197	0.0025204	0.0123056
pitA	Rv0545c	-1.26387	9.6896	0.00253332	0.0123541
	Rv0431	-1.28594	7.56965	0.00256655	0.0125013
	Rv0161	1.30185	6.78667	0.00261374	0.0127011
nth	Rv3674c	1.27008	8.20221	0.00261137	0.0127011
lprB	Rv1274	1.26552	8.58049	0.0026269	0.0127499
	Rv1367c	1.3008	6.81198	0.00264097	0.0128031
	Rv3517	1.43466	4.81326	0.00265602	0.0128609
	Rv0461	-1.31962	6.44079	0.00266198	0.0128746
	Rv2609c	-1.28925	7.18319	0.00273668	0.0132203
PE_PGRS8	Rv0742	1.33071	5.85068	0.00276473	0.0133401
	Rv0133	1.28296	7.15057	0.0027683	0.0133417
	Rv0976c	-1.69622	3.65751	0.00277684	0.0133516
	Rv2319c	-1.69622	3.65751	0.00277684	0.0133516
fadE13	Rv0975c	-1.77077	3.53337	0.00282199	0.0135528
	Rv0910	-1.29754	6.78511	0.00282628	0.0135576
pyrB	Rv1380	-1.42607	4.94287	0.00283326	0.0135594
mazF6	Rv1991c	1.39252	4.92972	0.00283326	0.0135594
pstC2	Rv0929	-1.347	5.7859	0.0028444	0.0135969
	Rv1489A	1.31044	6.13889	0.00286011	0.0136403
dnaE1	Rv1547	-1.24891	9.50579	0.0028584	0.0136403
folC	Rv2447c	-1.27769	7.30946	0.00288501	0.0137431
trpD	Rv2192c	-1.31388	6.16294	0.00292313	0.0139085
	Rv1883c	-1.26194	7.8219	0.00293778	0.0139621
	Rv0785	-1.31055	6.16058	0.00301121	0.0142854
	Rv2257c	-1.28698	6.65611	0.00301275	0.0142854
	Rv3142c	1.25361	7.91094	0.00303166	0.0143585
	Rv3686c	1.24284	8.93558	0.00304322	0.0143966
fucA	Rv0727c	1.58337	3.81991	0.00305571	0.0144391
	Rv0273c	1.28757	6.46698	0.00309579	0.0146117
	Rv1403c	1.58472	3.72367	0.00313291	0.01477
	Rv3467	1.73473	3.28898	0.00314483	0.0148091
lppU	Rv2784c	-1.28413	6.71208	0.00315067	0.0148197
bcpB	Rv1608c	1.26684	6.9352	0.00315592	0.0148274
rhlE	Rv3211	-1.23867	8.9677	0.00316636	0.0148595
gdh	Rv2476c	-1.23366	9.78118	0.00317598	0.0148877
	Rv1268c	1.46622	4.37286	0.0031874	0.0149241
	Rv3137	-1.26311	7.20525	0.00321302	0.015027
frdA	Rv1552	1.87325	2.75828	0.00321704	0.0150287
relE	Rv1246c	-1.37587	5.31824	0.00322979	0.0150711
ssr	RVnc0046	1.22468	16.263	0.0032476	0.0151371
	Rv1897c	-1.6012	4.01969	0.00327671	0.0152382
	Rv3656c	1.51848	3.99144	0.00327671	0.0152382
vapC34	Rv1741	1.30232	5.92921	0.0032825	0.0152479
	Rv2401A	1.5594	3.75504	0.00330738	0.0153461
	Rv0108c	1.2267	9.67983	0.00333761	0.0154689
	Rv0740	1.25312	7.12959	0.00342818	0.0158708
	Rv2693c	1.24323	7.56537	0.0034367	0.0158923
	Rv3453	1.48684	4.15823	0.00345477	0.015958
drrB	Rv2937	-1.38651	5.10908	0.00345982	0.0159633
fadB3	Rv1715	-1.82479	3.25269	0.0034764	0.0160219
argG	Rv1658	-1.25201	7.15103	0.00349634	0.0160957
recD	Rv0629c	-1.4424	4.72944	0.00352887	0.0162273
espA	Rv3616c	1.21558	11.0763	0.00353311	0.0162286
	Rv2647	-1.95427	3.08565	0.00355334	0.0163033
efp	Rv2534c	-1.2442	7.38908	0.00357311	0.0163758
	Rv2365c	-1.3639	5.30969	0.00357998	0.016389
cmr	Rv1675c	1.85194	2.85152	0.00360547	0.0164873
	Rv1473A	1.39841	4.57465	0.00361816	0.016527
	Rv0141c	-1.28365	6.07996	0.003723	0.016987
adk	Rv0733	-1.22552	8.20508	0.00372764	0.0169893
ssb	Rv0054	1.21358	8.98481	0.00377748	0.0171973
	Rv0885	1.22071	8.13618	0.00382554	0.0173585
rne	Rv2444c	-1.20944	9.64322	0.00382252	0.0173585
fadE24	Rv3139	1.21316	8.83305	0.00381758	0.0173585
aftC	Rv2673	1.22002	8.12375	0.00384003	0.017405
	Rv0328	1.32455	5.42274	0.00385979	0.0174561
	Rv3644c	1.23727	7.0649	0.00385626	0.0174561
fadD13	Rv3089	1.27596	6.04694	0.00388759	0.0175625
rho	Rv1297	-1.20461	10.1931	0.00390118	0.0176045
PE_PGRS29	Rv1468c	1.22249	7.69799	0.00392843	0.0177081
	Rv1174c	1.20243	9.87448	0.00397748	0.0179096
pyrH	Rv2883c	-1.21391	8.34089	0.00398328	0.0179161
rplX	Rv0715	-1.21509	8.14353	0.00405	0.0181962
	Rv1457c	-1.31076	5.53663	0.00406025	0.0182224
	Rv0474	1.24582	6.46356	0.00411871	0.0184646
rpmD	Rv0722	-1.22381	7.46175	0.00412989	0.0184744
	Rv3630	-1.26272	6.27562	0.00412852	0.0184744
pabB	Rv1005c	1.23151	6.99645	0.00414709	0.0185312
	Rv0372c	1.67159	3.16906	0.0041765	0.0186424
	Rv3525c	1.34496	4.95466	0.00418324	0.0186522
	Rv1692	-1.24142	6.69012	0.00422089	0.0187996
	Rv0498	-1.27814	5.93052	0.00425767	0.0188816
esxI	Rv1037c	1.2571	5.99868	0.00425437	0.0188816
uvrD2	Rv3198c	1.20309	8.41885	0.00425695	0.0188816
lipF	Rv3487c	-1.20373	8.446	0.00424721	0.0188816
	Rv0622	1.47801	4.00267	0.00429447	0.0190039
fadE17	Rv1934c	1.47801	4.00267	0.00429447	0.0190039
esxS	Rv3020c	1.77657	2.99288	0.00434191	0.0191931
espG2	Rv3889c	1.22053	7.20085	0.00434658	0.0191931
	Rv1989c	1.25437	6.17998	0.00442229	0.0195065
cobQ1	Rv0255c	-1.27681	5.81366	0.00444437	0.0195829
	Rv0139	-1.24249	6.41596	0.00446247	0.0196416
kshB	Rv3571	1.21779	7.17985	0.00446853	0.0196472
	Rv0183	-1.21609	7.29271	0.00451278	0.0198206
	Rv1577c	-1.43293	4.4554	0.00456645	0.0200349
	Rv2001	-1.35669	4.92269	0.00458712	0.0201041
clpC1	Rv3596c	1.17891	11.7544	0.00460783	0.0201734
cydC	Rv1620c	-1.37833	4.68353	0.00466368	0.0203745
	Rv3594	-1.31769	5.1605	0.0046623	0.0203745
	Rv0366c	-1.45963	4.14576	0.00474696	0.0207163
	Rv1686c	1.28595	5.36813	0.00477216	0.0208042
	Rv0194	1.28772	5.25338	0.00481336	0.0209616
	Rv0039c	1.23045	6.44	0.00483456	0.0210316
recB	Rv0630c	-1.31527	5.20646	0.00486996	0.0211632
	Rv0495c	1.18675	8.19355	0.00487896	0.02118
	Rv3762c	1.18632	8.08626	0.00489816	0.0212408
	Rv0499	-1.26771	5.83713	0.00491646	0.0212978
rpsE	Rv0721	-1.17731	9.09708	0.00494164	0.0213843
vapB6	Rv0657c	1.24393	5.88841	0.00496062	0.0214439
	Rv0345	1.28814	5.29826	0.00500744	0.0216235
	Rv0476	1.19448	7.3132	0.00502509	0.0216528
	Rv1194c	1.17492	8.91675	0.00502789	0.0216528
atpB	Rv1304	-1.18741	8.028	0.00503003	0.0216528
	Rv3361c	-1.29747	5.3908	0.00506971	0.0218008
	Rv0435c	-1.19133	7.52996	0.0051212	0.0219992
	Rv0948c	-1.19788	7.16531	0.00515182	0.0220958
	Rv1337	1.1707	9.04336	0.00515443	0.0220958
gpm2	Rv3214	1.19557	7.08546	0.00516604	0.0221225
rseA	Rv1222	1.18182	7.98712	0.00518276	0.0221479
PPE59	Rv3429	-1.2322	6.15287	0.00517766	0.0221479
	Rv0526	-1.20357	6.96824	0.00519031	0.0221572
ppsC	Rv2933	-1.26372	5.66183	0.00521413	0.0222358
	Rv0011c	-1.25995	5.77132	0.00524539	0.0223459
	Rv0854	1.20026	6.8171	0.00526993	0.0224272
mpr17	RVnc0029	2.93314	1.29341	0.00528154	0.0224534
	Rv1434	-1.42154	4.40465	0.0053233	0.0226075
fadA3	Rv1074c	1.16301	9.53745	0.00535287	0.0227097
	Rv1534	-1.26155	5.64355	0.00537693	0.0227882
	Rv3037c	-1.34486	4.85476	0.00540971	0.0229035
	Rv3472	1.21308	6.24954	0.00544562	0.0230318
glyU	Rvnt04	1.23875	5.71315	0.00546075	0.0230721
argR	Rv1657	-1.33046	4.87464	0.00549714	0.023202
	Rv0658c	-1.3406	4.78964	0.00551532	0.0232548
secF	Rv2586c	-1.16854	8.42391	0.00555133	0.0233827
pheS	Rv1649	-1.21703	6.32812	0.00559484	0.0235419
vapB12	Rv1721c	1.38596	4.3463	0.00569817	0.0239521
echA13	Rv1935c	1.40171	4.20099	0.00571223	0.0239781
	Rv2038c	-1.44638	4.08245	0.005716	0.0239781
	Rv1864c	1.20469	6.2798	0.00572719	0.0240005
qcrB	Rv2196	-1.15392	9.49934	0.0057532	0.0240849
ppiB	Rv2582	-1.1812	7.28931	0.00576295	0.0241012
oxcA	Rv0118c	1.18081	7.08738	0.00581143	0.0242793
ncrMT1234	RVnc0041	-1.15924	8.53011	0.00582178	0.0242978
proS	Rv2845c	-1.17604	7.27535	0.00586913	0.0244706
	Rv3430c	-1.51115	3.95418	0.00587717	0.0244793
	Rv1717	-2.04195	2.62892	0.00591186	0.0245988
	Rv2913c	1.20657	6.17008	0.00595619	0.0247583
gltS	Rv2992c	-1.16363	7.89158	0.00600268	0.0249263
PE_PGRS17	Rv0978c	1.63422	3.14276	0.00603582	0.0250386
	Rv3836	-1.35212	4.6993	0.00606392	0.0251298
far	Rv0855	1.17013	7.17729	0.00608952	0.0252105
wag31	Rv2145c	-1.147	9.18414	0.00611626	0.0252957
cobI	Rv2066	-1.18376	6.82462	0.00617635	0.0255185
	Rv0912	-1.48189	3.86973	0.00624646	0.0257823
	Rv1760	1.19666	6.16325	0.00630268	0.0259883
	Rv0556	-1.18976	6.53641	0.0063108	0.0259957
PE7	Rv0916c	1.42135	4.03947	0.00637329	0.0262268
hisG	Rv2121c	1.18838	6.27567	0.00639663	0.0262965
desA2	Rv1094	-1.14552	8.61908	0.00641852	0.0263602
	Rv1192	1.14334	8.65201	0.00645261	0.0264737
ggtA	Rv0773c	-1.18052	6.61505	0.00649232	0.0266101
	Rv0193c	1.28682	4.79495	0.00653477	0.0267308
cpsA	Rv3484	1.14207	8.57428	0.0065329	0.0267308
PPE4	Rv0286	-1.13767	9.0549	0.00657003	0.0268483
rpoZ	Rv1390	-1.14577	8.26289	0.00657994	0.0268621
	Rv0680c	1.18692	6.33028	0.00661946	0.0269699
	Rv0726c	1.16126	7.03725	0.00661871	0.0269699
	Rv1431	1.17899	6.38494	0.00666872	0.0271168
esxC	Rv3890c	1.14447	8.08737	0.00666484	0.0271168
cfp29	Rv0798c	-1.18318	6.5919	0.00669243	0.0271864
	Rv3827c	1.14507	7.81421	0.0067222	0.0272803
vapC29	Rv0617	-1.25753	5.27853	0.00678416	0.0274775
	Rv1786	1.25893	4.96926	0.00677838	0.0274775
	Rv0738	1.17698	6.377	0.00680296	0.0275265
	Rv0358	1.25552	5.08845	0.00683172	0.0276157
	Rv0513	-1.18016	6.52098	0.00686788	0.0277135
	Rv1524	-1.25493	5.21018	0.00687511	0.0277135
fabG3	Rv2002	-1.20126	6.00967	0.00688823	0.0277135
	Rv3026c	-1.48415	3.80502	0.00687666	0.0277135
ctpJ	Rv3743c	1.68434	3.01601	0.00688961	0.0277135
bkdC	Rv2495c	1.12838	9.23672	0.00691547	0.0277903
tam	Rv0294	1.30924	4.51252	0.00695361	0.0279163
eccC3	Rv0284	-1.12577	9.70068	0.00697927	0.0279697
PE26	Rv2519	-1.1545	7.18007	0.00698053	0.0279697
vapC14	Rv1953	-1.31696	4.80431	0.00699847	0.0280143
	Rv2739c	-1.19037	6.15835	0.00705771	0.028224
	Rv1004c	1.15323	6.96413	0.00713629	0.0285105
	Rv1167c	1.15462	6.978	0.00719541	0.0286909
lytB1	Rv3382c	1.21127	5.61713	0.00719038	0.0286909
	Rv2003c	-1.39002	4.09608	0.00726212	0.0289288
	Rv2293c	1.2492	5.10065	0.00730273	0.0290625
	Rv1636	1.12513	8.60023	0.00731513	0.0290837
	Rv0272c	1.15191	6.89683	0.00738084	0.0293165
	Rv2302	1.13706	7.37079	0.00745915	0.029599
	Rv0316	-1.1504	6.93145	0.00750225	0.029699
treZ	Rv1562c	-1.28199	4.92709	0.00750603	0.029699
	Rv3368c	1.21064	5.44903	0.00749801	0.029699
	Rv2561	1.15062	6.63339	0.0076655	0.0303009
	Rv0923c	-1.20731	5.60571	0.00774395	0.0305522
	Rv1747	-1.11601	8.79355	0.00774093	0.0305522
wbbL1	Rv3265c	-1.14185	7.1603	0.00778815	0.0306971
	Rv1312	-1.17705	6.00554	0.00784495	0.0308914
nuoA	Rv3145	-1.13212	7.47583	0.00786796	0.0309523
espG3	Rv0289	-1.11001	9.18857	0.00792617	0.0311515
	Rv0061c	-1.14906	6.66582	0.00794185	0.0311833
ephG	Rv2740	1.16117	6.16934	0.00800257	0.0313918
	Rv1260	-1.13006	7.30491	0.00812422	0.0318386
	Rv0079	1.19555	5.52495	0.00815516	0.031899
	Rv0999	-1.21382	5.431	0.00814821	0.031899
yrbE3B	Rv1965	1.42271	3.84116	0.00818219	0.0319743
pafC	Rv2095c	-1.13629	6.92176	0.00829625	0.0323892
PE25	Rv2431c	-1.1312	7.1805	0.00834378	0.0325439
mce1D	Rv0172	-1.10328	8.96266	0.00838284	0.0326633
frdC	Rv1554	3.70015	1.11293	0.00839028	0.0326633
	Rv3365c	-1.11785	7.77661	0.00840556	0.0326918
	Rv1097c	-1.11979	7.56611	0.00849883	0.0330234
lprK	Rv0173	-1.10644	8.38125	0.00854526	0.0331411
	Rv1887	-1.10423	8.58672	0.00854449	0.0331411
kdpA	Rv1029	-1.21472	5.33289	0.00859974	0.0332896
ilvN	Rv3002c	-1.14979	6.44616	0.00859656	0.0332896
	Rv2525c	1.10213	8.51129	0.00861202	0.0333058
trpB	Rv1612	-1.09917	8.94414	0.00863019	0.0333447
	Rv0110	1.16107	5.84091	0.00866023	0.033398
fbiB	Rv3262	-1.14409	6.57333	0.00865954	0.033398
ppnK	Rv1695	-1.15134	6.29287	0.00868236	0.0334519
	Rv2367c	-1.12697	7.0405	0.00874617	0.0336361
usfY	Rv3288c	1.17852	5.58335	0.00874654	0.0336361
	Rv2037c	1.13626	6.43215	0.00877133	0.0337
nicT	Rv2856	-1.22617	4.996	0.00880778	0.0338084
PE5	Rv0285	-1.11831	7.16074	0.00890544	0.0341514
ccsA	Rv0529	-1.12168	6.97567	0.00893999	0.0342285
eccA5	Rv1798	-1.11047	7.68674	0.0089422	0.0342285
	Rv1126c	-1.16878	5.75343	0.00896671	0.0342904
	Rv1742	1.19361	5.31833	0.00902356	0.0344757
	Rv0947c	-1.4141	3.82137	0.00905452	0.0345619
PPE36	Rv2108	1.1417	6.27179	0.00910983	0.0347407
	Rv1718	-1.2774	4.57706	0.00918536	0.0349963
	Rv0309	1.08397	9.71679	0.00928231	0.0353003
	Rv1725c	1.27002	4.58391	0.00927817	0.0353003
vapC32	Rv1114	-1.22092	5.14035	0.00933028	0.0354488
	Rv1856c	-1.1109	7.24613	0.00933862	0.0354488
opcA	Rv1446c	-1.10797	7.39574	0.00936627	0.0354882
	Rv2191	1.18531	5.28484	0.00936209	0.0354882
	Rv1425	1.10822	7.17939	0.00938077	0.0355104
	Rv1200	-1.12549	6.67302	0.00940193	0.0355578
higA	Rv1956	1.15465	5.87386	0.00942047	0.0355952
mas	Rv2940c	-1.08006	9.9178	0.00952559	0.0359593
	Rv3267	-1.0851	8.72392	0.00960184	0.0362139
	Rv3371	1.09019	7.93938	0.00965241	0.0363713
lpqI	Rv0237	-1.0908	7.99847	0.00968332	0.0364543
fadE10	Rv0873	1.0788	9.32827	0.00971604	0.036544
	Rv0790c	1.20807	4.91624	0.00972842	0.0365571
	Rv3736	1.10455	7.05519	0.00983283	0.0369158
	Rv3813c	-1.15299	5.81535	0.00986551	0.0370047
fixB	Rv3028c	-1.0756	9.44468	0.00994461	0.0372674
ileS	Rv1536	-1.09774	7.47001	0.00996569	0.0372784
yrbE4A	Rv3501c	1.11864	6.38247	0.00996346	0.0372784
	Rv2668	1.17775	5.19283	0.0100729	0.0376452
lipE	Rv3775	-1.12998	6.268	0.0100956	0.0376957
pknE	Rv1743	1.08343	7.78174	0.0102137	0.038102
idsA1	Rv3398c	-1.39665	3.80901	0.0102488	0.0381985
	Rv1841c	-1.16655	5.57754	0.0102887	0.0383124
pstS2	Rv0932c	-1.06831	9.82695	0.0103395	0.0383972
ftsK	Rv2748c	-1.07174	9.08259	0.0103395	0.0383972
radA	Rv3585	1.08424	7.6891	0.0103276	0.0383972
emrB	Rv0783c	-1.11282	6.59309	0.0103751	0.0384947
	Rv2766c	1.10647	6.60335	0.0104133	0.0386016
	Rv0235c	-1.29681	4.47946	0.010475	0.0387604
era	Rv2364c	-1.14582	5.89317	0.0104749	0.0387604
	Rv2708c	1.07632	8.03301	0.0105311	0.0389327
	Rv1377c	1.11096	6.41497	0.0105559	0.0389895
	Rv2929	-1.10847	6.6614	0.0105789	0.0390394
PE_PGRS1	Rv0109	1.16791	5.18616	0.0106091	0.0391156
fadD34	Rv0035	-1.12777	6.16012	0.0106197	0.0391198
	Rv2979c	1.102	6.57843	0.0107935	0.0397244
rplY	Rv1015c	-1.09102	7.13112	0.0108377	0.0398513
glnA3	Rv1878	1.13201	5.77312	0.0108908	0.0400107
	Rv3714c	1.14475	5.63802	0.0109311	0.0400873
parB	Rv3917c	-1.08325	7.36961	0.0109225	0.0400873
	Rv3701c	-1.13754	5.83286	0.0110437	0.0404522
	Rv3829c	1.11693	5.96332	0.0110503	0.0404522
qcrA	Rv2195	-1.05992	9.36504	0.0110827	0.0405347
	Rv1975	1.37419	3.62632	0.011094	0.0405401
thiG	Rv0417	1.14454	5.57161	0.011194	0.0408329
	Rv3489	1.06382	8.37268	0.0111915	0.0408329
mutB	Rv1493	-1.09541	6.66788	0.0112537	0.041014
hemZ	Rv1485	-1.12435	6.05483	0.0112803	0.0410748
	Rv3400	-1.09628	6.69873	0.0113319	0.0412261
acpA	Rv0033	-1.27464	4.46395	0.0113702	0.0412918
pntB	Rv0157	-1.06246	8.51927	0.011376	0.0412918
	Rv0376c	1.15235	5.45921	0.0113801	0.0412918
	Rv1072	1.05012	11.4669	0.0114086	0.0413586
scpB	Rv1710	-1.1078	6.35192	0.0114316	0.0413888
	Rv3363c	-1.17994	5.28824	0.011437	0.0413888
trpG	Rv0013	1.06989	7.52728	0.0114813	0.0414758
	Rv2113	1.09434	6.4704	0.0114783	0.0414758
	Rv3700c	-1.16325	5.31764	0.0115183	0.0415729
pbpA	Rv0016c	-1.06778	7.73897	0.0115382	0.0416082
proB	Rv2439c	-1.1318	5.72806	0.0115759	0.0417077
pyrR	Rv1379	-1.12213	5.9166	0.0116385	0.0418964
mapA	Rv0734	-1.06651	7.7417	0.0116541	0.0419159
	Rv1245c	-1.10752	6.13522	0.0118132	0.0424512
arsB2	Rv3578	-1.19006	4.9448	0.0118295	0.0424724
sigA	Rv2703	-1.04792	9.64492	0.0119111	0.0427281
vapB20	Rv2550c	-1.291	4.3123	0.0119514	0.042761
msrB	Rv2674	1.07137	7.17619	0.011938	0.042761
	Rv3747	-1.08528	6.66862	0.0119454	0.042761
gcvB	Rv1832	1.04743	9.43508	0.0119652	0.0427731
	Rv0963c	1.32153	3.89442	0.0120211	0.0429354
	Rv1526c	-1.27137	4.34114	0.012036	0.0429514
	Rv1687c	1.17006	5.03014	0.0120678	0.0430274
pdc	Rv0853c	1.06573	7.50464	0.0120838	0.0430473
	Rv0051	-1.07229	7.19387	0.0121403	0.043062
aao	Rv1905c	-1.06895	7.33637	0.0121335	0.043062
mbtF	Rv2379c	-1.0965	6.26554	0.0121201	0.043062
acpS	Rv2523c	-1.10527	6.11126	0.0121073	0.043062
	Rv3605c	-1.12853	5.76992	0.0121105	0.043062
	Rv1556	1.15323	5.09966	0.0122389	0.0433741
esxV	Rv3619c	1.09182	6.35156	0.0123208	0.0436268
	Rv0263c	1.06958	7.12006	0.0123328	0.0436319
mce2D	Rv0592	-1.40901	3.53188	0.0123461	0.0436414
lpqD	Rv3390	1.06498	7.29244	0.0123568	0.0436415
aceE	Rv2241	-1.04458	9.08953	0.0123942	0.0437362
eccC2	Rv3894c	-1.05289	8.13062	0.0124308	0.0438275
mmpL1	Rv0402c	-1.07946	6.68732	0.0124673	0.0439188
lppA	Rv2543	-1.87759	2.50821	0.0124954	0.0439423
	Rv3424c	-1.87759	2.50821	0.0124954	0.0439423
cmk	Rv1712	-1.10274	6.15404	0.0125419	0.0440681
	Rv0920c	-1.07542	6.84722	0.0125567	0.0440825
	Rv3168	1.09539	6.07105	0.012758	0.0447508
mtrA	Rv3246c	-1.04171	8.74138	0.0128196	0.0449286
	Rv0303	1.08956	6.12081	0.0128415	0.0449671
hemY	Rv2677c	-1.05579	7.48054	0.0128693	0.045026
yrbE1A	Rv0167	-1.04739	8.18289	0.0128931	0.045071
greA	Rv1080c	-1.04374	8.48353	0.0129437	0.0452096
	Rv3675	1.10025	5.89129	0.0132393	0.0462027
lpqT	Rv1016c	-1.07275	6.73424	0.0132868	0.0463292
mycP2	Rv3886c	-1.06647	6.77969	0.0133573	0.0465355
ndkA	Rv2445c	-1.05604	7.07385	0.0133714	0.0465451
	Rv0306	1.19772	4.43666	0.0133964	0.0465809
gid	Rv3919c	-1.08395	6.24688	0.0134043	0.0465809
	Rv1936	1.15949	4.95489	0.0134244	0.0466111
	Rv0755A	1.07333	6.19753	0.013696	0.0475141
lppH	Rv3576	1.0562	6.74808	0.0140674	0.0487614
mce1B	Rv0170	-1.03064	8.33697	0.0140908	0.0488014
	Rv2286c	1.08257	5.89706	0.014132	0.0489029
pks8	Rv1662	-1.08596	5.95575	0.014188	0.0490373
	Rv2012	1.23589	4.21353	0.0141947	0.0490373
	Rv1056	1.07904	6.00432	0.0142504	0.0491513
	Rv1506c	-1.10755	5.55393	0.0142516	0.0491513
pyrE	Rv0382c	-1.06353	6.45879	0.0143329	0.0493497
ilvB1	Rv3003c	-1.03588	7.73176	0.0143331	0.0493497
	Rv2944	-1.22843	4.35265	0.0144083	0.0495669
	Rv1503c	-1.68096	2.88463	0.0145837	0.0501285
pnp	Rv0535	1.10464	5.36447	0.0146861	0.0504032
carA	Rv1383	-1.08714	6.0176	0.0146882	0.0504032
cobS	Rv2208	-1.11156	5.3984	0.0147122	0.0504436
	Rv1824	-1.11042	5.41609	0.0147248	0.0504448
rnpA	Rv3923c	-1.02914	7.86287	0.014826	0.0507491
	Rv1363c	1.0245	7.95785	0.0148841	0.0509057
	Rv3179	1.0907	5.63365	0.0149021	0.0509249
	Rv2553c	-1.02906	7.68021	0.014991	0.0511861
rplA	Rv0641	-1.01308	9.44612	0.0150611	0.0513828
PPE51	Rv3136	-1.01134	9.83926	0.0150848	0.051421
	Rv0739	1.07738	5.97035	0.015109	0.0514609
	Rv1043c	-1.0742	6.04427	0.0151429	0.0515336
pstS1	Rv0934	-1.02144	8.10949	0.0151835	0.051629
eccA2	Rv3884c	-1.03712	7.0836	0.0152605	0.051848
	Rv0477	1.03218	7.21659	0.0153063	0.0519606
	Rv2146c	-1.04785	6.65847	0.015379	0.0521643
	Rv0927c	-1.10412	5.51791	0.0154352	0.0523119
papA2	Rv3820c	1.03529	6.96427	0.0154578	0.0523452
aroG	Rv2178c	1.00619	9.63243	0.0156157	0.0528365
	Rv3680	-1.01013	8.9029	0.0156376	0.0528669
	Rv1533	-1.03779	6.8549	0.0156926	0.0530091
	Rv3268	-1.02437	7.59391	0.0157258	0.0530777
	Rv3131	1.1642	4.41426	0.0157829	0.0532268
	Rv1597	-1.03219	7.00004	0.0159422	0.05372
cobC	Rv2231c	-1.0915	5.54304	0.0160796	0.0540078
cdsA	Rv2881c	-1.02332	7.45016	0.0160769	0.0540078
	Rv2974c	-1.10511	5.50143	0.0160802	0.0540078
fadE29	Rv3543c	-1.09958	5.49767	0.0160802	0.0540078
esxK	Rv1197	-1.00292	9.21351	0.0161975	0.0543573
ctpE	Rv0908	-1.03596	6.82063	0.016237	0.0544013
	Rv3651	-1.02046	7.52358	0.0162327	0.0544013
	Rv0276	0.99949	9.71424	0.0162786	0.0544962
	Rv3742c	1.35069	3.45794	0.0164527	0.0550342
	Rv2011c	1.35914	3.51624	0.0165489	0.0553111
tgs2	Rv3734c	0.999814	8.90558	0.0166108	0.0554729
	Rv1499	1.55253	2.53778	0.0166546	0.055529
mesJ	Rv3625c	-1.07236	5.74618	0.0166446	0.055529
accD2	Rv0974c	-1.35305	3.64262	0.0167062	0.0556557
kstR	Rv3574	1.0679	5.54262	0.0167333	0.055701
fxsA	Rv2053c	1.0056	8.10019	0.016778	0.0558046
atpE	Rv1305	-1.0009	8.62268	0.0167989	0.0558158
	Rv2216	-1.00883	7.88445	0.0168086	0.0558158
ansP1	Rv2127	-1.01045	7.64555	0.0170006	0.056408
erg3	Rv1814	1.03398	6.51056	0.0170326	0.0564684
tyrS	Rv1689	-1.02901	6.86203	0.0170502	0.0564812
PPE56	Rv3350c	1.0036	8.02734	0.017084	0.0565476
vapC10	Rv1397c	-1.00826	7.81617	0.0171529	0.0567302
gatB	Rv3009c	0.995858	8.68989	0.0171787	0.0567699
	Rv1057	1.03797	6.17394	0.0173447	0.0572724
mpt53	Rv2878c	1.02903	6.32235	0.0176087	0.0580975
	Rv0302	-1.05394	5.90898	0.01764	0.0581538
	Rv0386	0.997855	7.95029	0.0177044	0.058284
	Rv3292	-1.02565	6.55032	0.0177078	0.058284
frr	Rv2882c	-1.00081	7.91651	0.0177541	0.0583898
	Rv0216	1.05986	5.76328	0.0178104	0.0585279
rpsN1	Rv0717	-0.999367	7.958	0.0178331	0.0585559
	Rv3753c	0.990659	8.35311	0.0180499	0.0592204
	Rv0452	1.06186	5.50486	0.0181599	0.0595338
fadE15	Rv1467c	0.995373	7.6988	0.018259	0.0597913
	Rv2650c	-1.14881	4.71829	0.0182675	0.0597913
	Rv2039c	-1.45776	3.10212	0.0185027	0.0605128
recC	Rv0631c	-1.09424	5.25028	0.0185665	0.0606732
hisA	Rv1603	-1.03007	6.2606	0.0185824	0.0606769
pafB	Rv2096c	-1.01018	6.94951	0.018625	0.0607197
	Rv3218	1.03858	5.97735	0.0186228	0.0607197
	Rv0893c	-1.19618	4.28913	0.0187077	0.0609408
gpdA1	Rv0564c	1.01417	6.58432	0.0187284	0.06096
PE_PGRS40	Rv2371	1.21346	4.03933	0.0189017	0.0614753
	Rv2542	1.01508	6.49241	0.0189279	0.0615119
	Rv0713	-1.00888	6.7823	0.0189925	0.061663
uspC	Rv2318	-1.33291	3.62855	0.0190446	0.061663
lppZ	Rv3006	0.976113	9.38524	0.0190434	0.061663
	Rv3480c	-0.992203	7.73074	0.0190435	0.061663
	Rv3722c	-0.982167	8.55837	0.0190494	0.061663
	Rv0049	0.976373	8.6111	0.0195002	0.0630727
fadE8	Rv0672	0.974811	8.62021	0.0196852	0.0635708
acpM	Rv2244	-0.969281	10.0317	0.0196775	0.0635708
hemN	Rv2388c	0.989716	7.136	0.0197941	0.0638723
PE_PGRS30	Rv1651c	0.978309	8.1255	0.0199061	0.0641836
	Rv3636	1.00278	6.56089	0.0199317	0.0642156
	Rv0265c	-1.01687	6.26157	0.0199863	0.064291
narK1	Rv2329c	0.968547	9.36754	0.0199838	0.064291
secD	Rv2587c	-0.972033	8.7177	0.0200756	0.0645275
aldA	Rv0768	1.01444	6.20709	0.020137	0.0646743
coaA	Rv1092c	-1.1027	4.96233	0.0201847	0.064777
	Rv0813c	0.971459	8.46074	0.0202597	0.064967
gmk	Rv1389	-0.964914	9.86596	0.0202885	0.0649984
dlaT	Rv2215	-0.966869	9.32012	0.0203011	0.0649984
	Rv3896c	0.986587	7.04973	0.0203474	0.0650958
	Rv0310c	-1.17933	4.19125	0.0206343	0.0659624
nei	Rv3297	1.03746	5.68028	0.0206597	0.0659922
	Rv3311	0.965185	8.81615	0.020751	0.0662324
kdtB	Rv2965c	-1.04549	5.63942	0.0208276	0.0664254
lysS	Rv3598c	-0.976111	7.81452	0.0208508	0.0664476
PPE65	Rv3621c	1.06832	5.07414	0.0209251	0.0666329
	Rv0195	2.22307	1.59809	0.0209521	0.0666673
oppA	Rv1280c	-0.974538	7.86795	0.0209787	0.0666701
fadD11	Rv1550	-1.08114	5.0679	0.0209854	0.0666701
	Rv1667c	-1.11204	4.66259	0.0210522	0.0668306
hab	Rv3078	-1.12423	4.63951	0.0211267	0.0669637
	Rv3655c	1.11806	4.61743	0.0211267	0.0669637
	Rv2719c	0.988441	6.72212	0.0212629	0.0673435
hadC	Rv0637	-0.962025	8.73185	0.0213559	0.0675859
cycA	Rv1704c	-0.970253	7.92667	0.0214018	0.0676272
	Rv2955c	0.972677	7.58902	0.0213952	0.0676272
	Rv3066	1.08271	4.92103	0.0214499	0.0677271
cut4	Rv3452	0.994329	6.4787	0.0214717	0.0677437
msrA	Rv0137c	1.00585	6.11684	0.0215366	0.0678963
	Rv0613c	-0.957926	9.09712	0.0216132	0.0680859
	Rv1046c	-0.990532	6.77685	0.0217689	0.0685238
	Rv3586	1.00471	6.17999	0.021802	0.0685754
obg	Rv2440c	-0.979741	7.01717	0.0219963	0.0691054
	Rv3273	-0.960196	8.40217	0.0220041	0.0691054
ponA1	Rv0050	-0.955698	8.85738	0.0220998	0.0693
	Rv0842	1.08123	4.75621	0.0220904	0.0693
	Rv3036c	0.972377	7.21418	0.0221842	0.0695116
	Rv2159c	0.952561	9.04974	0.0222763	0.0695879
	Rv2517c	1.0372	5.26766	0.0222749	0.0695879
purK	Rv3276c	-0.971992	7.41168	0.0222369	0.0695879
	Rv3767c	0.970614	7.19959	0.0222676	0.0695879
ald	Rv2780	0.965184	7.61469	0.0223178	0.0696646
metC	Rv3340	0.980166	6.72139	0.0224041	0.069881
	Rv1762c	0.994632	6.15236	0.0224957	0.0700906
	Rv2969c	0.953094	8.65674	0.0225054	0.0700906
nuoB	Rv3146	-0.96886	7.48516	0.022566	0.0702264
	Rv3428c	-5.77192	0.698898	0.0226768	0.0705177
	Rv2776c	0.978948	6.57681	0.022752	0.0706981
vapC20	Rv2549c	-1.16998	4.13967	0.0227755	0.0707177
	Rv3492c	-0.996079	6.19804	0.0228557	0.070913
fadE7	Rv0400c	0.961332	7.50479	0.0229137	0.0710393
bglS	Rv0186	-0.954949	8.0949	0.0229548	0.0711132
fadD4	Rv0214	0.992817	6.1582	0.0230409	0.0713262
	Rv2278	-2.13568	1.85067	0.0230709	0.071344
	Rv2659c	1.02596	5.49248	0.0230814	0.071344
	Rv3612c	-1.00461	6.03216	0.0231668	0.0715542
mmpL4	Rv0450c	-0.953274	8.19159	0.02329	0.0718159
	Rv0851c	1.03028	5.44944	0.0233039	0.0718159
	Rv3169	0.971712	6.8974	0.0232905	0.0718159
hadB	Rv0636	-0.949879	8.50139	0.023389	0.0720241
	Rv2696c	-0.95228	7.9968	0.0237149	0.0729729
	Rv0375c	1.18448	3.84152	0.0237407	0.0729977
	Rv1435c	-0.954836	7.75737	0.0237759	0.0730432
	Rv2251	0.967342	6.87357	0.023791	0.0730432
lipU	Rv1076	0.98783	6.11223	0.023914	0.0733661
	Rv0027	1.00417	5.75472	0.0240946	0.0737001
	Rv0147	0.941812	8.69374	0.0240905	0.0737001
	Rv1502	-0.975449	6.6546	0.0240506	0.0737001
mpa	Rv2115c	0.936609	10.045	0.0240647	0.0737001
	Rv0296c	0.949781	7.72321	0.0241982	0.073852
	Rv1324	-0.950427	7.97839	0.0241856	0.073852
	Rv3600c	-0.999884	5.97093	0.0241944	0.073852
	Rv2114	0.957771	7.24414	0.0242787	0.0740427
	Rv1489	0.951916	7.51214	0.0243005	0.0740545
	Rv0518	-1.01457	5.58793	0.0243855	0.0742583
fadD15	Rv2187	0.937182	9.0817	0.02447	0.0744606
ftsY	Rv2921c	-0.95152	7.46962	0.0246133	0.0748412
	Rv3903c	-1.05832	5.05253	0.0246356	0.0748537
	Rv2990c	-1.0837	4.81839	0.0247172	0.075046
	Rv0609A	-1.01421	5.50766	0.0249134	0.0755861
cyp128	Rv2268c	-1.10052	4.49072	0.0250813	0.0759831
cyp137	Rv3685c	0.944168	7.80306	0.0250641	0.0759831
cfp21	Rv1984c	0.945542	7.37843	0.0252829	0.0765376
moaA2	Rv0869c	0.942999	7.70943	0.0253751	0.07676
pcaA	Rv0470c	0.930726	9.03076	0.0254934	0.0770048
rpsO	Rv2785c	-0.940133	7.95131	0.025479	0.0770048
glnU	Rvnt36	-1.09038	4.67862	0.0255958	0.0772572
	Rv2978c	0.943619	7.55958	0.025651	0.0773671
rpsR1	Rv0055	0.928585	9.24833	0.0256761	0.0773858
pheT	Rv1650	-0.939553	7.82906	0.0256977	0.0773942
mmr	Rv3065	1.07685	4.35678	0.0257848	0.0775998
	Rv1050	1.06015	4.6219	0.0259274	0.0779718
espD	Rv3614c	0.924481	9.91609	0.0259748	0.0780572
rocE	Rv2320c	-1.12728	4.28341	0.0263836	0.0791701
PPE58	Rv3426	-1.12728	4.28341	0.0263836	0.0791701
eccB3	Rv0283	-0.926833	8.79537	0.0264352	0.079267
cyp136	Rv3059	0.940888	7.28419	0.0266572	0.0798746
lppO	Rv2290	-0.942127	7.37028	0.0267841	0.0801962
	Rv1730c	-1.01364	5.38719	0.0268445	0.0802876
	Rv2036	0.985339	5.81509	0.0268537	0.0802876
echA21	Rv3774	-0.937768	7.47283	0.0269549	0.0805316
devB	Rv1445c	-0.956963	6.62772	0.0269957	0.080595
	Rv3493c	-0.945683	6.98898	0.0270335	0.0806493
irtA	Rv1348	-1.06236	4.90984	0.0270614	0.08066
	Rv1364c	0.937242	7.39928	0.0270763	0.08066
	Rv0424c	-0.941638	7.12239	0.0272327	0.0810671
phyA	Rv3397c	-1.12283	4.15283	0.0272978	0.0812022
	Rv0811c	0.924618	8.24709	0.0273453	0.0812846
fadB5	Rv1912c	0.936606	7.3001	0.0274368	0.0814976
hisS	Rv2580c	-0.942222	7.13313	0.0274684	0.0815327
	Rv3175	1.20435	3.65089	0.0275952	0.0818497
accD4	Rv3799c	-0.915113	9.75678	0.0276414	0.0819276
ureC	Rv1850	-0.958384	6.27079	0.0276766	0.0819731
pks9	Rv1664	0.956767	6.19637	0.0277265	0.0820308
MTS2975	RVnc0040	-1.11895	4.3949	0.027736	0.0820308
rpmA	Rv2441c	-0.921346	8.32168	0.0278783	0.0823923
	Rv0678	0.952274	6.39381	0.0281934	0.0832331
folB	Rv3607c	-0.970742	5.93971	0.0282033	0.0832331
smc	Rv2922c	-0.91711	8.5636	0.0282931	0.0834382
	Rv1778c	-0.974121	5.91783	0.028411	0.083666
	Rv2569c	0.973989	5.74428	0.0283935	0.083666
	Rv2842c	0.923501	7.54644	0.0289043	0.0850576
dinX	Rv1537	-1.15844	3.93528	0.028989	0.0852459
	Rv1320c	0.920633	7.7386	0.0290163	0.0852652
PE17	Rv1646	0.915992	8.00212	0.0292631	0.0859291
	Rv0574c	1.07206	4.42775	0.0294775	0.0863735
	Rv1024	-0.942574	6.49523	0.029449	0.0863735
mtrB	Rv3245c	-0.910339	8.48943	0.0294728	0.0863735
	Rv0961	1.01492	4.94385	0.0297173	0.087014
	Rv3096	-0.928314	6.96036	0.0297476	0.0870409
	Rv1693	-0.950291	6.3658	0.0297918	0.087108
G2	RVnc0010	1.22215	3.26246	0.0299142	0.087404
	Rv0690c	-0.92675	6.93604	0.0300522	0.0877448
rplN	Rv0714	-0.908452	8.31325	0.0300895	0.0877751
gcvH	Rv1826	-0.923864	7.29571	0.0301053	0.0877751
modA	Rv1857	-0.970536	5.67818	0.0301695	0.0879
	Rv1422	-0.927537	6.85194	0.0302152	0.0879708
	Rv1069c	-0.91994	7.30679	0.0303118	0.0881894
caeA	Rv2224c	0.900907	8.98215	0.0305577	0.0888419
	Rv3673c	0.902692	8.59672	0.0306208	0.0889627
	Rv2312	1.0741	4.30342	0.030667	0.0890338
	Rv0567	-0.916642	7.48718	0.0308133	0.0892067
	Rv1773c	1.18867	3.68372	0.030798	0.0892067
fadE21	Rv2789c	-0.921603	7.19005	0.0307711	0.0892067
	Rv3431c	-1.04885	4.71017	0.0307617	0.0892067
pimA	Rv2610c	-0.915499	7.41281	0.0312005	0.090264
	Rv0275c	0.91562	7.15349	0.0312283	0.090268
	Rv1255c	0.978403	5.30669	0.0312458	0.090268
	Rv0259c	-1.3669	3.03881	0.0315204	0.0909336
	Rv3604c	-0.920002	6.92575	0.0315081	0.0909336
pmmB	Rv3308	-0.942733	6.27927	0.0315698	0.0910122
kasA	Rv2245	-0.890291	10.7713	0.0316458	0.0911395
	Rv3338	0.923589	6.77583	0.0316583	0.0911395
	Rv2972c	1.0596	4.21307	0.0316989	0.0911925
atpA	Rv1308	-0.891526	9.92579	0.0317451	0.0912615
PE_PGRS59	Rv3595c	0.921529	6.75218	0.0319777	0.091866
	Rv1075c	0.934096	6.27902	0.0321998	0.0923106
sugB	Rv1237	-0.961067	5.68619	0.0321776	0.0923106
aroD	Rv2537c	-1.01156	5.02129	0.0321601	0.0923106
esxG	Rv0287	-0.893601	8.78657	0.0322542	0.0924022
fbiC	Rv1173	-0.891699	8.84501	0.0325518	0.0931897
	Rv2023c	-1.26108	3.50586	0.0326066	0.0932167
rfbE	Rv3781	-0.93117	6.39664	0.0325959	0.0932167
	Rv0191	0.915476	6.86899	0.0327477	0.0935552
	Rv0064	-0.898685	7.71046	0.0330492	0.094351
	Rv3184	-1.86896	2.00315	0.0333763	0.0952187
ctpH	Rv0425c	-0.882688	9.82616	0.0335061	0.0955225
	Rv2648	-1.46853	2.58329	0.0335331	0.0955333
kgtP	Rv3476c	0.911902	6.74144	0.0337292	0.0960255
	Rv1738	1.42754	2.45682	0.0338323	0.0962524
	Rv1910c	0.928776	6.06652	0.0339082	0.0964016
secE1	Rv0638	-0.882683	9.11931	0.034035	0.0966951
	Rv1428c	-0.937654	5.99926	0.0341928	0.0970764
galE1	Rv3634c	-0.911019	6.64829	0.0348161	0.0987777
rocA	Rv1187	0.94756	5.33615	0.0348868	0.0988418
	Rv3070	0.961892	5.24489	0.0348798	0.0988418
	Rv2133c	0.910604	6.4128	0.0350013	0.099098
	Rv3103c	-0.94625	5.77249	0.0350551	0.0991821
aceAa	Rv1915	0.878891	8.71747	0.035081	0.099187
inhA	Rv1484	-0.887234	7.91385	0.0351249	0.0992428
	Rv1714	-1.1042	3.95034	0.0352672	0.0993956
	Rv1861	0.923964	6.08502	0.0352757	0.0993956
PPE35	Rv1918c	0.884368	7.80524	0.0352336	0.0993956
nusA	Rv2841c	0.886492	7.86305	0.0352443	0.0993956
phoH1	Rv2368c	-0.886858	7.74616	0.0355235	0.100025
xseA	Rv1108c	-0.890796	7.29232	0.0356144	0.100213
whiA	Rv1423	-0.901697	6.94875	0.03586	0.100835
	Rv0493c	0.946411	5.41795	0.036332	0.102086
ldtB	Rv2518c	0.873518	8.59019	0.0363548	0.102086
	Rv0875c	-0.940328	5.47519	0.0367583	0.103149
pks13	Rv3800c	-0.86254	11.2595	0.0371321	0.104127
esxH	Rv0288	-0.867126	9.17366	0.0372133	0.104283
	Rv1002c	-0.896102	6.64568	0.0372928	0.104435
fgd1	Rv0407	0.87589	7.68905	0.0374951	0.10493
eno	Rv1023	-0.872656	8.15627	0.0375524	0.105019
	Rv3401	-0.869574	8.39384	0.0377571	0.10552
fdxB	Rv3554	0.883056	7.03407	0.0380466	0.106257
zwf1	Rv1121	-0.892973	6.7195	0.0382071	0.106632
	Rv1104	0.901414	6.31935	0.0382895	0.10679
aldC	Rv2858c	-0.880915	7.3347	0.0383318	0.106835
	Rv2306B	1.10415	3.7115	0.0383872	0.106917
	Rv1592c	0.866105	8.29598	0.0384439	0.107003
	Rv0213c	0.944909	5.22089	0.038509	0.107111
	Rv2730	0.993378	4.59948	0.038762	0.107742
pfkA	Rv3010c	0.878318	7.09849	0.0390482	0.108464
	Rv2307D	1.08819	3.66077	0.0391281	0.108613
rimI	Rv3420c	-0.88816	6.61192	0.0393358	0.109116
	Rv2795c	-0.876053	7.17021	0.0393907	0.109194
	Rv3046c	-0.982554	4.80476	0.0395679	0.109612
	Rv0863	-0.870886	7.53129	0.0396218	0.109687
	Rv2410c	0.868976	7.52665	0.0396983	0.109825
	Rv3422c	-0.925821	5.59031	0.039815	0.110074
glgP	Rv1328	-0.85831	8.50831	0.0400093	0.110537
	Rv2522c	-0.878578	6.85086	0.0400758	0.110646
eccA3	Rv0282	-0.849518	10.2658	0.0403915	0.111264
	Rv2854	0.902508	5.83067	0.040408	0.111264
dppD	Rv3663c	-0.926559	5.67766	0.0404014	0.111264
	Rv3863	-0.86255	7.82277	0.0403437	0.111264
lpqF	Rv3593	-0.856688	8.30854	0.040728	0.11207
mmpS5	Rv0677c	0.879433	6.4806	0.0408501	0.112188
	Rv1931c	0.988892	4.48967	0.0408528	0.112188
lipT	Rv2045c	0.868797	7.27771	0.0408351	0.112188
ctpB	Rv0103c	-0.856011	8.34283	0.0409396	0.1122
	Rv0724A	1.33266	2.60094	0.0409935	0.1122
argJ	Rv1653	-0.876983	6.8128	0.0409743	0.1122
	Rv2478c	-1.08287	4.03412	0.0409575	0.1122
	Rv3049c	-0.859566	7.9278	0.0409883	0.1122
	Rv1382	-0.943187	5.1899	0.0410518	0.112285
	Rv0681	-0.881629	6.62205	0.041086	0.112303
aroB	Rv2538c	-0.891002	6.43727	0.0412051	0.112554
mprB	Rv0982	-0.854729	8.10986	0.0417423	0.113946
	Rv2308	1.00979	4.28802	0.0419965	0.114564
prcA	Rv2109c	-0.859514	7.37228	0.0424077	0.115609
	Rv3364c	-0.928337	5.27622	0.0425068	0.115802
	Rv1154c	0.897026	5.88508	0.0426	0.115979
mbtJ	Rv2385	1.01685	4.26654	0.0426793	0.116104
gatA	Rv3011c	-0.861181	7.36068	0.0427025	0.116104
apt	Rv2584c	0.84532	8.59526	0.0427348	0.116116
	Rv1680	0.887175	6.04701	0.0428133	0.116252
fixA	Rv3029c	-0.839886	9.89825	0.042893	0.116392
	Rv1998c	0.919912	5.17841	0.0430052	0.116542
	Rv2566	-0.887579	6.19588	0.0429819	0.116542
adhA	Rv1862	0.861378	6.91067	0.0431455	0.116845
alkB	Rv3252c	0.854969	7.29005	0.0432205	0.116971
	Rv1149	-0.89065	6.03483	0.0433013	0.117113
	Rv3538	0.933903	5.07625	0.0435675	0.117755
metS	Rv1007c	-0.860485	7.03807	0.04371	0.118063
	Rv1085c	0.856026	7.12861	0.0438168	0.118274
	Rv1939	1.10139	3.62745	0.0440851	0.11892
	Rv0909	-0.868047	6.56233	0.0441413	0.118993
	Rv0874c	0.934436	4.97185	0.0442064	0.119091
	Rv3329	-0.866023	6.66117	0.0443376	0.119366
	Rv0552	0.863544	6.67841	0.044425	0.119445
bfrB	Rv3841	0.831957	10.7188	0.0444062	0.119445
	Rv3233c	-0.862743	6.73969	0.0448377	0.120476
	Rv3069	0.922878	5.16688	0.0450492	0.120965
vapC28	Rv0609	-0.857936	6.87364	0.0454868	0.122029
PE27	Rv2769c	0.942899	4.83035	0.0455047	0.122029
	Rv0579	0.882664	5.97766	0.0458347	0.122138
nusG	Rv0639	-0.830025	9.49509	0.0456737	0.122138
	Rv0880	-1.04807	4.14644	0.045784	0.122138
citA	Rv0889c	-0.860164	6.7575	0.0456508	0.122138
pimE	Rv1159	-0.93559	4.92435	0.045795	0.122138
pknH	Rv1266c	0.849821	7.09748	0.0457321	0.122138
	Rv1588c	0.977728	4.52627	0.045718	0.122138
mbtE	Rv2380c	-0.869251	6.30414	0.0457174	0.122138
dedA	Rv2637	0.887415	5.72505	0.0457011	0.122138
	Rv3821	0.860845	6.62982	0.0458428	0.122138
lysA	Rv1293	-0.836736	8.00466	0.0460759	0.12268
vapC35	Rv1962c	-0.915883	5.19178	0.0466901	0.124235
	Rv1190	1.02735	3.91849	0.0469916	0.124956
	Rv0464c	0.831214	8.08587	0.0472352	0.125523
mcr11	RVnc0013	0.859351	6.31036	0.0472901	0.125588
	Rv0986	0.885556	5.62105	0.0473648	0.125705
	Rv2230c	-0.866516	6.24818	0.0474136	0.125753
	Rv2361c	-0.866219	6.27534	0.0474755	0.125836
	Rv0393	1.31118	2.76616	0.0475441	0.125937
hbhA	Rv0475	0.823212	9.11144	0.0477123	0.12622
	Rv1684	-0.920152	5.15484	0.0477004	0.12622
	Rv0044c	0.848734	6.74966	0.0479322	0.126642
	Rv1682	0.927484	4.99813	0.0479335	0.126642
mce1F	Rv0174	-0.820458	9.66811	0.048044	0.126852
vapB9	Rv0959A	-1.0185	4.21051	0.0480814	0.126869
	Rv1322	0.866007	6.08316	0.0482704	0.127104
	Rv1637c	0.834067	7.39499	0.048331	0.127104
rpsB	Rv2890c	-0.821409	9.20247	0.0482364	0.127104
	Rv2901c	-0.845109	7.01752	0.0483558	0.127104
rnhB	Rv2902c	-0.827248	8.19666	0.0483386	0.127104
	Rv3272	-0.846729	6.86643	0.0483064	0.127104
psd	Rv0437c	0.841187	6.92113	0.0483893	0.127111
ppsB	Rv2932	-1.00564	4.31906	0.0484599	0.127215
fadD16	Rv0852	0.894435	5.41866	0.0487494	0.127851
	Rv1723	-0.959074	4.43093	0.0487644	0.127851
serT	Rvnt44	0.834829	7.3361	0.0489072	0.128144
trpT	Rvnt08	-0.828482	7.78226	0.0491201	0.12862
	Rv1339	0.825785	7.78464	0.0497188	0.130022
	Rv2406c	0.825785	7.78464	0.0497188	0.130022
pgk	Rv1437	-0.819464	8.47572	0.0498389	0.13017
manB	Rv3264c	-0.826975	7.76243	0.049808	0.13017
vapB28	Rv0608	-0.842382	6.7589	0.0499223	0.130305
uvrD1	Rv0949	-0.832383	7.17108	0.0500737	0.130617
	Rv1591	-0.852422	6.42049	0.0502539	0.130966
	Rv2434c	-0.978037	4.26289	0.0503029	0.130966
devS	Rv3132c	-0.850395	6.49815	0.0502732	0.130966
dgt	Rv2344c	-0.83617	7.0643	0.0503687	0.131054
	Rv0547c	-0.859774	6.21595	0.0504836	0.131219
ceoC	Rv2692	-0.853678	6.30294	0.0504958	0.131219
	Rv1353c	-1.34348	2.64856	0.0506208	0.131461
mpt63	Rv1926c	0.835561	6.77575	0.0507308	0.13158
	Rv3740c	0.883311	5.46648	0.0507124	0.13158
murI	Rv1338	0.827155	7.44495	0.0507848	0.131637
	Rv2223c	0.816718	8.13047	0.0509118	0.1318
	Rv3901c	0.923323	4.65446	0.0509003	0.1318
	Rv2573	-1.08413	3.59434	0.0509782	0.131889
	Rv1432	0.929491	4.82183	0.0510332	0.131948
	Rv0187	0.834414	6.86176	0.0511018	0.132042
fadD35	Rv2505c	0.885372	5.272	0.0517387	0.133604
	Rv1520	0.845521	6.15149	0.0526395	0.135845
folP1	Rv3608c	-0.829843	6.78247	0.0527688	0.136093
mutT3	Rv0413	0.833473	6.58839	0.0528361	0.136181
echA7	Rv0971c	-1.00212	4.02707	0.0533767	0.137317
mbtH	Rv2377c	-1.00212	4.02707	0.0533767	0.137317
lipQ	Rv2485c	-0.919761	4.68204	0.0533728	0.137317
hycE	Rv0087	-0.957504	4.39558	0.0534916	0.13744
PPE43	Rv2768c	0.885342	5.22178	0.0534848	0.13744
	Rv0078	-0.929214	4.82167	0.0540368	0.138754
	Rv1129c	0.887929	5.21059	0.0541023	0.138836
accA3	Rv3285	-0.798586	9.5665	0.0543328	0.13934
	Rv1417	-0.843463	6.01514	0.0545917	0.13983
wag22	Rv1759c	0.841348	6.01064	0.0545917	0.13983
	Rv2484c	0.800837	8.62626	0.0546975	0.140013
mcr3	RVnc0021	0.807943	7.76274	0.0547592	0.140084
lppT	Rv1799	1.10383	3.18756	0.0549158	0.140378
	Rv1835c	-0.84615	6.00611	0.0549765	0.140378
pdxH	Rv2607	0.866703	5.35564	0.0549516	0.140378
	Rv1977	0.82872	6.4903	0.0550478	0.140473
polA	Rv1629	-0.807763	7.58964	0.055323	0.141087
vapC2	Rv0301	-0.831599	6.39081	0.0553755	0.141134
galU	Rv0993	-0.825997	6.5934	0.0554803	0.141229
mbtL	Rv1344	0.845686	5.95417	0.0554815	0.141229
lytB2	Rv1110	0.806938	7.63577	0.055523	0.141247
	Rv0488	1.06001	3.42154	0.0556015	0.141359
PPE49	Rv3125c	-1.03897	3.62746	0.0559049	0.142043
rfbD	Rv3783	-0.819945	6.72524	0.0559506	0.142071
	Rv1231c	-0.838731	6.09532	0.0564427	0.143158
C8	RVnc0006	-0.842035	6.00347	0.0564484	0.143158
vapC40	Rv2596	-0.890683	5.21407	0.0565552	0.14334
dnaQ	Rv3711c	-0.815791	6.85256	0.0567296	0.143694
	Rv0455c	0.795227	8.38019	0.0567732	0.143716
cyp126	Rv0778	-0.816013	6.66324	0.0568981	0.143944
fadE3	Rv0215c	-0.866658	5.41094	0.057002	0.143988
metH	Rv2124c	0.790998	9.11262	0.0569978	0.143988
guaB2	Rv3411c	0.792197	8.79782	0.0570557	0.143988
hsaG	Rv3535c	0.837621	5.84735	0.0570522	0.143988
	Rv2184c	-0.812361	7.02307	0.0571416	0.144116
	Rv0192	0.799239	7.82561	0.0572397	0.144275
	Rv0666	-1.09438	3.39315	0.0574029	0.144421
	Rv1496	-0.835612	6.04188	0.0573754	0.144421
ctaE	Rv2193	-0.796285	8.13172	0.0573984	0.144421
	Rv1508A	0.885151	4.94065	0.0575162	0.144617
	Rv2705c	0.860251	5.38579	0.0576183	0.144785
lpqW	Rv1166	-0.80747	7.18358	0.0577758	0.145004
	Rv3238c	0.851166	5.47812	0.0577648	0.145004
gyrB	Rv0005	-0.786091	9.7313	0.0580158	0.145111
	Rv1513	0.800526	7.58224	0.0578838	0.145111
	Rv2169c	0.800016	7.3198	0.0580192	0.145111
accD6	Rv2247	-0.786392	9.69205	0.0579559	0.145111
	Rv2627c	1.46666	2.10829	0.05801	0.145111
PE_PGRS54	Rv3508	0.787556	9.14877	0.0580302	0.145111
folK	Rv3606c	-0.829062	6.04812	0.0584437	0.146056
otsA	Rv3490	0.783958	9.45859	0.058833	0.146939
	Rv3055	0.895642	4.76571	0.0590503	0.147393
	Rv1504c	-1.08721	3.53037	0.0593838	0.148135
accD3	Rv0904c	0.826808	5.86466	0.0594761	0.148275
	Rv0611c	0.80246	6.93843	0.0595728	0.148337
	Rv1401	0.821686	6.21341	0.0595442	0.148337
hemE	Rv2678c	-0.808677	6.7876	0.0597057	0.148578
	Rv2182c	0.785176	8.32772	0.0600731	0.149401
	Rv2235	-0.818266	6.39861	0.0602495	0.14975
	Rv3342	0.806494	6.56163	0.0604946	0.150268
zwf2	Rv1447c	-0.783347	8.48512	0.0606528	0.15057
thiL	Rv2977c	0.79165	7.48	0.0613029	0.152092
higB	Rv1955	0.855231	5.253	0.0613646	0.152153
ufaA1	Rv0447c	-0.874126	5.04209	0.06148	0.152347
rbfA	Rv2838c	0.776381	8.91757	0.0619568	0.153436
	Rv1893	0.811505	6.23791	0.0620586	0.153596
mdh	Rv1240	-0.777541	8.67484	0.0621812	0.153714
	Rv3843c	0.775383	9.01064	0.0621561	0.153714
	Rv3705A	0.824081	5.83883	0.0622454	0.15378
	Rv0339c	-0.813812	6.21439	0.0623073	0.153841
argS	Rv1292	-0.786662	7.62836	0.0624293	0.15401
PPE37	Rv2123	1.27153	2.56273	0.0624507	0.15401
	Rv1378c	-0.799045	6.78147	0.0625412	0.154141
	Rv3678A	-0.792932	7.13153	0.0629861	0.155144
udgB	Rv1259	0.831193	5.71628	0.063284	0.155785
rpsF	Rv0053	0.771363	8.79492	0.0638362	0.156892
	Rv1480	-0.776768	8.15753	0.0637818	0.156892
	Rv2857c	-0.805102	6.4996	0.0638483	0.156892
	Rv0921	0.810988	5.99153	0.0638911	0.156903
ahpE	Rv2238c	-0.787296	7.17077	0.0642828	0.157771
vapB32	Rv1113	-0.876439	4.90954	0.0648689	0.15883
	Rv2360c	-0.885255	4.91523	0.0648689	0.15883
rplU	Rv2442c	-0.774756	8.04623	0.0648518	0.15883
vapC43	Rv2872	-0.885255	4.91523	0.0648689	0.15883
rubA	Rv3251c	0.792946	6.64289	0.065133	0.159382
vapC42	Rv2759c	-0.98194	3.86918	0.0652435	0.159524
	Rv3840	1.24663	2.44954	0.0652687	0.159524
	Rv0492c	0.802888	6.15074	0.0653987	0.159747
	Rv3421c	-0.830964	5.529	0.0656917	0.160367
lsr2	Rv3597c	-0.764241	8.84861	0.0664137	0.162034
	Rv2402	0.773796	7.4866	0.0664934	0.162132
	Rv3698	0.854213	4.80848	0.0666919	0.16252
moxR3	Rv3164c	-0.857618	5.09408	0.0670336	0.163255
	Rv0249c	0.760307	8.89898	0.0675266	0.164359
	Rv3603c	-0.790253	6.61962	0.067653	0.164569
	Rv2562	0.828421	5.44263	0.0677506	0.164709
	Rv2473	0.840718	5.26836	0.0678821	0.164931
	Rv3611	-0.983337	3.91994	0.0680093	0.165143
	Rv1376	-0.832263	5.32149	0.0680629	0.165175
	Rv2024c	0.772809	7.20765	0.0683642	0.165706
	Rv2619c	0.849864	4.90299	0.0683836	0.165706
	Rv3466	0.809918	5.78885	0.0684028	0.165706
	Rv0449c	-0.877986	4.65498	0.0685052	0.165857
esxW	Rv3620c	0.784839	6.43133	0.0685937	0.165973
xylB	Rv0729	0.778756	6.67909	0.0690359	0.166945
	Rv3909	-0.763885	7.85246	0.0690966	0.166994
vapC39	Rv2530c	-0.83746	5.16061	0.0693866	0.167596
	Rv1958c	-1.27519	2.73825	0.0696284	0.168081
vapB4	Rv0596c	1.01135	3.43838	0.0697201	0.168204
trmU	Rv3024c	0.763262	7.71322	0.0699513	0.168663
ilvG	Rv1820	0.767322	7.22554	0.0700051	0.168693
	Rv1868	0.778453	6.50452	0.0701279	0.16889
	Rv0367c	-0.840094	5.18149	0.0705205	0.169736
	Rv1744c	1.00848	3.56906	0.0707751	0.170158
	Rv2923c	0.806151	5.61867	0.0707783	0.170158
mpt83	Rv2873	-0.861448	4.92311	0.0708817	0.170307
bpoB	Rv1123c	-0.797224	6.0069	0.0709756	0.170433
	Rv3349c	-1.07479	3.22247	0.0710932	0.170611
hsaD	Rv3569c	0.765301	7.11433	0.0711329	0.170611
	Rv1829	0.75539	7.88253	0.0712264	0.170736
	Rv3770B	-0.919175	4.18546	0.0715028	0.171298
	Rv0944	-0.866417	4.72907	0.0716459	0.171541
lpqM	Rv0419	0.74785	8.92574	0.0720561	0.172423
sugI	Rv3331	-0.774385	6.68332	0.0721134	0.17246
	Rv0737	0.932168	3.82527	0.0722079	0.172585
	Rv3777	0.773469	6.65792	0.0724829	0.173142
	Rv0508	-0.879704	4.56963	0.0727384	0.173349
relB	Rv1247c	-0.792777	5.92826	0.0727356	0.173349
	Rv1593c	-0.792777	5.92826	0.0727356	0.173349
fic	Rv3641c	-0.879704	4.56963	0.0727384	0.173349
PE_PGRS7	Rv0578c	-0.751485	8.16497	0.0728303	0.173419
mscR	Rv2259	0.748584	8.38216	0.072852	0.173419
	Rv0831c	-0.748268	8.48913	0.0729858	0.173637
otsB1	Rv2006	0.765356	6.87719	0.0730374	0.173659
	Rv0426c	0.743922	8.80603	0.0737531	0.175259
rpfE	Rv2450c	-0.811188	5.50138	0.0739122	0.175536
	Rv1279	-0.751836	7.73057	0.0740185	0.175687
	Rv1532c	1.0802	3.11456	0.074152	0.175853
glyV	Rvnt27	-0.881653	4.4789	0.0741738	0.175853
	Rv3671c	-0.759302	7.17174	0.0743494	0.176167
	Rv0801	0.765633	6.56022	0.0745296	0.176493
hycQ	Rv0086	-0.843762	4.91176	0.0746633	0.176527
treS	Rv0126	-0.748454	8.04987	0.0746265	0.176527
trpS	Rv3336c	-0.756454	7.09882	0.0746728	0.176527
	Rv1226c	-0.821456	5.33173	0.0747944	0.176712
murA	Rv1315	0.744491	8.14322	0.0750266	0.177159
lpqP	Rv0671	0.755062	7.07492	0.0753011	0.177603
mprA	Rv0981	-0.758415	7.0903	0.0752901	0.177603
lppF	Rv1921c	0.918413	4.09584	0.0754287	0.177802
vapB34	Rv1740	0.796961	5.39064	0.075749	0.178353
	Rv2915c	-0.765421	6.64462	0.0757487	0.178353
	Rv2912c	0.817624	5.14057	0.0758866	0.178574
	Rv1770	-0.739774	8.30085	0.0768011	0.180566
	Rv2271	-0.741818	7.99472	0.0768209	0.180566
	Rv1676	0.739197	8.14941	0.0774294	0.181893
	Rv0653c	0.884463	4.23487	0.0776693	0.182352
vapC22	Rv2829c	-0.803134	5.3703	0.0777379	0.182409
cmaA2	Rv0503c	0.733054	8.9394	0.0777927	0.182433
	Rv3040c	-0.772539	6.14145	0.0781994	0.183283
pheA	Rv3838c	0.737926	7.78513	0.0784534	0.183773
iniB	Rv0341	-0.727282	10.1221	0.0788589	0.184513
	Rv0769	0.775328	5.91009	0.0788468	0.184513
	Rv2091c	0.7295	9.1355	0.0789217	0.184555
	Rv0441c	0.79373	5.41032	0.0795919	0.186016
secY	Rv0732	-0.729087	8.88345	0.079705	0.186175
PPE20	Rv1387	-0.745643	7.20422	0.0798439	0.186393
	Rv1748	0.816072	4.92829	0.0799051	0.18643
	Rv0538	0.738738	7.49972	0.0801919	0.186993
pqqE	Rv0693	-0.731502	8.1385	0.0804234	0.187427
dapA	Rv2753c	-0.732021	8.14116	0.0805646	0.187543
proZ	Rv3756c	-0.846119	4.71604	0.0805606	0.187543
	Rv0881	-0.819886	5.0285	0.0809451	0.188322
accA1	Rv2501c	-0.749166	6.62097	0.0810109	0.188369
	Rv0268c	0.74213	6.85889	0.0810612	0.188379
	Rv1574	-1.28301	2.45758	0.0813077	0.188845
	Rv0879c	-0.774307	5.98181	0.0813675	0.188877
	Rv1627c	0.728372	8.15209	0.0817724	0.18971
PPE50	Rv3135	-0.729435	7.83377	0.0821977	0.190483
purE	Rv3275c	-0.747216	6.72388	0.0821982	0.190483
dapC	Rv0858c	-0.768146	5.94568	0.0822532	0.190503
tpi	Rv1438	-0.733306	7.59481	0.082327	0.190567
esxJ	Rv1038c	0.777822	5.57272	0.0826655	0.191135
	Rv2418c	-0.745889	6.71676	0.0826564	0.191135
	Rv2556c	0.729466	7.59646	0.0827822	0.191297
	Rv0073	0.722205	8.59197	0.0829299	0.191531
	Rv0122	0.832996	4.47816	0.0830296	0.191586
ctaD	Rv3043c	0.718522	9.46228	0.0830471	0.191586
ilvX	Rv3509c	0.725718	8.05336	0.0835495	0.192637
	Rv2422	1.43811	1.77726	0.083932	0.193411
	Rv1303	-0.744313	6.68389	0.0841779	0.193652
	Rv2134c	0.726211	7.69872	0.0841304	0.193652
	Rv2752c	-0.730441	7.43448	0.0841472	0.193652
	Rv2551c	-0.87439	4.15655	0.0842865	0.193793
	Rv2774c	0.878321	4.0427	0.0846285	0.194471
	Rv2613c	-0.735587	6.79005	0.0846822	0.194485
	Rv0843	0.903109	3.93809	0.0849748	0.194984
	Rv2876	0.731827	7.08368	0.0849944	0.194984
aac	Rv0262c	0.74071	6.57792	0.0854383	0.195487
	Rv0725c	0.833444	4.37019	0.0854353	0.195487
	Rv1144	-0.775672	5.44841	0.0854515	0.195487
	Rv1728c	-0.747766	6.40193	0.0853496	0.195487
thyA	Rv2764c	0.719577	8.10858	0.0853524	0.195487
	Rv3486	0.805506	4.90653	0.085593	0.195702
	Rv0480c	0.731466	7.08674	0.0856493	0.195722
PE8	Rv1040c	0.964271	3.455	0.0861437	0.196743
gpdA2	Rv2982c	0.733188	6.93216	0.0862615	0.196902
mntH	Rv0924c	-0.76201	5.7931	0.0863583	0.197014
	Rv1138c	-0.801059	4.95205	0.0867873	0.197883
cinA	Rv1901	-0.721795	7.51772	0.086845	0.197905
vapB29	Rv0616A	-0.81682	4.89456	0.0872012	0.198606
	Rv0323c	0.88417	4.01725	0.0872782	0.198672
iniC	Rv0343	-0.718528	7.8612	0.087418	0.19888
gca	Rv0112	0.726957	6.98559	0.0876343	0.199151
yajC	Rv2588c	-0.719485	7.593	0.0876182	0.199151
	Rv3190A	0.726415	6.80212	0.0878919	0.199516
truA	Rv3455c	-0.729935	6.92847	0.0878592	0.199516
	Rv3289c	0.822622	4.53306	0.088235	0.200184
	Rv3677c	-0.72269	7.36739	0.0883346	0.2003
hisI	Rv1606	-0.768316	5.59008	0.0891024	0.201923
	Rv3224B	-0.759732	5.67891	0.0891488	0.201923
	Rv2314c	-0.718126	7.28694	0.089215	0.201962
	Rv1354c	-0.950366	3.56946	0.0894151	0.202303
mce2C	Rv0591	-1.01635	3.26507	0.0902831	0.204155
narU	Rv0267	1.054	3.03778	0.0904458	0.20441
	Rv1273c	-0.799764	4.99454	0.0906637	0.204628
	Rv1490	0.792001	4.98739	0.0906637	0.204628
cysE	Rv2335	0.711371	7.60128	0.0907414	0.204628
	Rv3406	0.838266	4.23157	0.0907212	0.204628
	Rv1003	0.752416	5.81038	0.091115	0.205358
galE2	Rv0501	-0.704125	8.52488	0.0912997	0.205549
fadD26	Rv2930	0.698349	10.1452	0.0912831	0.205549
	Rv1771	-0.71566	7.40224	0.0914036	0.205671
echA5	Rv0675	0.735404	5.94463	0.0918778	0.206458
	Rv1352	0.728071	6.26917	0.0919042	0.206458
mazE8	Rv2274A	-1.42059	2.18938	0.0918123	0.206458
esxN	Rv1793	0.698256	9.46659	0.0920193	0.206604
	Rv0699	-2.32372	0.821253	0.0922987	0.207005
	Rv2891	-2.32372	0.821253	0.0922987	0.207005
rnpB	Rvns01	0.693508	16.2743	0.0923782	0.20707
	Rv0767c	0.816859	4.6631	0.092534	0.207184
	Rv1439c	0.811981	4.48602	0.09258	0.207184
	Rv3752c	0.713503	7.24847	0.0924988	0.207184
ppm1	Rv2051c	-0.699644	8.61622	0.0931266	0.208137
	Rv2676c	0.709567	7.33896	0.0931158	0.208137
ugpC	Rv2832c	-0.884146	3.95028	0.0931579	0.208137
vapC12	Rv1720c	0.847287	4.18662	0.0933822	0.208525
mbtN	Rv1346	0.708533	7.39972	0.0937429	0.209217
	Rv0870c	0.716457	6.85837	0.0939721	0.209614
	Rv2877c	0.763276	5.33673	0.0941791	0.209962
	Rv2598	-0.812825	4.46618	0.0949283	0.211518
	Rv1906c	-0.699508	7.96578	0.0950312	0.211632
mkl	Rv0655	-0.69369	8.96242	0.095141	0.211657
cydA	Rv1623c	0.711433	6.72351	0.0951451	0.211657
vapB22	Rv2830c	-0.781287	5.06573	0.0954485	0.212217
	Rv3213c	-0.699085	7.91525	0.0956431	0.212534
	Rv3284	-0.704257	7.51397	0.0957128	0.212574
tgs1	Rv3130c	0.933252	3.56444	0.0962283	0.213604
	Rv2489c	0.883984	3.89484	0.0964282	0.213932
vapB43	Rv2871	-0.764081	5.24335	0.0968527	0.214758
	Rv0698	-0.865058	4.06929	0.0973427	0.215612
	Rv2578c	0.849262	4.05345	0.0973427	0.215612
	Rv2554c	-0.703908	7.04645	0.0974859	0.215813
zmp1	Rv0198c	-0.689453	8.72453	0.0976826	0.216016
eccB5	Rv1782	0.68674	9.33706	0.0976414	0.216016
	Rv0067c	0.817236	4.21881	0.0980056	0.216614
	Rv2310	1.28722	2.00032	0.098175	0.216871
ansP2	Rv0346c	-0.688955	8.56759	0.0983176	0.21707
	Rv1890c	0.785612	4.7494	0.0983981	0.217131
	Rv2749	0.73283	5.78224	0.0985528	0.217325
PE35	Rv3872	-0.696164	7.64166	0.0985918	0.217325
dfp	Rv1391	-0.689094	8.20502	0.0989813	0.218067
	Rv2665	-0.741571	5.7061	0.0990419	0.218083
	Rv0830	0.793694	4.59322	0.099155	0.218098
	Rv1865c	0.731053	5.79726	0.0991306	0.218098
fadE31	Rv3562	-0.760456	5.25863	0.0992538	0.218199
	Rv1041c	-0.713535	6.31635	0.0994489	0.218511
	Rv1314c	0.731581	5.58201	0.100207	0.219913
	Rv2414c	-0.728007	5.79571	0.100247	0.219913
	Rv2970A	0.701251	6.90148	0.100162	0.219913
	Rv0520	0.788185	4.62725	0.100437	0.220212
tlyA	Rv1694	-0.703316	6.82843	0.10074	0.220758
	Rv3474	-1.23265	2.42423	0.101121	0.221356
	Rv3845	-1.23265	2.42423	0.101121	0.221356
	Rv0245	0.725565	5.7778	0.10139	0.221828
F6	RVnc0008	-0.745209	5.51882	0.101547	0.221936
nanT	Rv1902c	0.730363	5.51465	0.101547	0.221936
	Rv0525	-0.698529	6.90896	0.101775	0.222295
mmaA4	Rv0642c	0.677764	9.51299	0.10182	0.222295
	Rv1961	0.902001	3.37209	0.10198	0.222526
papA1	Rv3824c	-0.693494	7.22908	0.102061	0.222585
mihF	Rv1388	-0.67772	9.37835	0.102188	0.222625
ncrMT3949	RVnc0044	0.681247	8.44052	0.102161	0.222625
	Rv0988	-0.72172	6.09047	0.1026	0.223405
	Rv2387	0.700172	6.48588	0.102738	0.223586
	Rv3524	-0.679912	8.5414	0.102849	0.223709
murF	Rv2157c	-0.692827	7.15326	0.103329	0.224518
	Rv3335c	-0.746182	5.24967	0.103314	0.224518
gabD2	Rv1731	0.68372	7.56595	0.103692	0.225187
	Rv3649	-0.791977	4.54303	0.104147	0.226055
	Rv0805	0.672029	9.9003	0.104273	0.22621
esxB	Rv3874	-0.668407	11.244	0.105283	0.228281
hemK	Rv1300	0.675156	8.37653	0.105425	0.22831
	Rv2280	-0.685316	7.20664	0.105464	0.22831
	Rv2844	-0.694386	6.72818	0.105433	0.22831
	Rv1927	0.706986	6.01849	0.10571	0.228723
	Rv0164	-0.680432	7.78596	0.105885	0.228982
mtr	Rv2855	0.689287	6.83404	0.106206	0.229554
fadD5	Rv0166	-0.673522	8.20635	0.106633	0.230355
	Rv0330c	1.01111	2.81336	0.107074	0.231187
rplS	Rv2904c	-0.669702	8.85504	0.107278	0.231385
	Rv3647c	-0.691789	6.612	0.107259	0.231385
iunH	Rv3393	-0.729428	5.46487	0.107374	0.231471
glgC	Rv1213	0.685467	7.03863	0.107684	0.231989
hflX	Rv2725c	-0.669457	8.70301	0.107772	0.231989
accE5	Rv3281	-0.673398	8.03303	0.107784	0.231989
	Rv1626	-0.671172	8.2915	0.107878	0.232071
pepQ	Rv2535c	-0.677252	7.53597	0.107963	0.232132
	Rv0628c	0.6767	7.59806	0.108317	0.232772
adhD	Rv3086	0.699201	6.16226	0.108443	0.232921
rpsR2	Rv2055c	-0.985799	3.16427	0.10929	0.234616
fadD30	Rv0404	-0.681631	7.04251	0.109757	0.234639
sigK	Rv0445c	-0.679765	7.11761	0.109756	0.234639
dapD	Rv1201c	-0.666482	8.60734	0.109587	0.234639
eccD5	Rv1795	0.664527	8.98005	0.109507	0.234639
	Rv3030	-0.697692	6.25641	0.10971	0.234639
PE_PGRS50	Rv3345c	0.686046	6.69114	0.10949	0.234639
lpqE	Rv3584	0.667039	8.34781	0.109472	0.234639
	Rv3773c	0.730655	5.15131	0.109743	0.234639
	Rv2311	-0.94318	3.43588	0.110029	0.235097
sucC	Rv0951	-0.661834	9.35303	0.110455	0.235724
lhr	Rv3296	0.666917	8.09374	0.110494	0.235724
	Rv3699	0.682141	6.87499	0.110381	0.235724
	Rv2675c	0.686992	6.63126	0.110578	0.235782
	Rv1258c	-0.75661	4.7857	0.110801	0.236134
mak	Rv0127	-0.671044	7.45373	0.111223	0.236883
PE_PGRS42	Rv2487c	-0.838211	4.09335	0.111268	0.236883
ceoB	Rv2691	-0.688084	6.56258	0.111488	0.23723
pncB2	Rv0573c	0.820066	3.91864	0.111821	0.237814
	Rv2516c	0.716692	5.55422	0.111879	0.237816
	Rv1115	-0.798732	4.29338	0.112118	0.2382
vapB30	Rv0623	-0.744564	5.06264	0.112262	0.23826
metE	Rv1133c	-0.655881	10.6945	0.112213	0.23826
	Rv3134c	0.698008	5.89989	0.112324	0.238269
PE_PGRS24	Rv1325c	0.677355	6.74793	0.112669	0.238578
	Rv2597	-0.703966	5.86143	0.112702	0.238578
	Rv3195	-0.880147	3.52426	0.11268	0.238578
eccB2	Rv3895c	-0.69086	6.18254	0.112577	0.238578
	Rv1842c	-0.677711	6.96989	0.112785	0.23863
phoY1	Rv3301c	-0.686579	6.58877	0.113095	0.239133
pks2	Rv3825c	0.65424	10.5426	0.113139	0.239133
leuV	Rvnt20	1.54095	1.65137	0.113724	0.240247
	Rv1081c	-0.786706	4.51031	0.113828	0.240342
	Rv1619	0.693386	6.02375	0.11398	0.240539
	Rv0492A	0.7997	4.18324	0.114267	0.241022
rpmG1	Rv2057c	0.842139	3.80437	0.114327	0.241026
	Rv2867c	0.661025	7.81278	0.114787	0.241871
	Rv0232	-0.716999	5.45713	0.115066	0.242334
	Rv2250c	0.929277	3.08178	0.11559	0.243313
nirB	Rv0252	-0.677862	6.44976	0.115671	0.243359
	Rv2183c	-0.68376	6.22208	0.116002	0.243931
	Rv1508c	0.656535	7.93524	0.116169	0.244157
ephE	Rv3670	-0.723815	5.35295	0.116934	0.24564
acg	Rv2032	1.23007	2.10016	0.117164	0.2459
fadE23	Rv3140	0.651639	8.6846	0.117178	0.2459
blaR	Rv1845c	0.656889	7.6668	0.117516	0.246483
	Rv2468A	-0.671603	6.74441	0.117718	0.246781
metK	Rv1392	0.64916	8.86943	0.118132	0.247146
nlhH	Rv1399c	0.681894	6.08262	0.118106	0.247146
PE16	Rv1430	0.679892	6.25123	0.117982	0.247146
plsB2	Rv2482c	-0.654491	8.1572	0.118092	0.247146
hemL	Rv0524	-0.657981	7.66297	0.118319	0.247179
	Rv1836c	-0.6467	9.5596	0.118449	0.247179
	Rv1867	-0.706647	5.50918	0.11836	0.247179
rmlD	Rv3266c	-0.687462	6.03016	0.118268	0.247179
whiB6	Rv3862c	0.689388	5.83458	0.118434	0.247179
	Rv0175	-0.646273	9.18222	0.11933	0.248891
	Rv1598c	0.698875	5.64348	0.119527	0.249176
	Rv1749c	-0.665873	6.69214	0.120169	0.250389
	Rv2203	-0.684262	6.12393	0.12025	0.250429
	Rv1290c	0.710829	5.22444	0.121176	0.252229
	Rv3531c	0.72542	4.9754	0.121437	0.252517
	Rv3760	-0.722439	4.988	0.121437	0.252517
pks4	Rv1181	0.639566	9.88092	0.121983	0.253524
	Rv2375	0.706765	5.14936	0.122205	0.253858
	Rv0258c	-0.830474	3.91599	0.122424	0.254012
	Rv0882	-0.870367	3.63619	0.122464	0.254012
mce3F	Rv1971	0.793642	3.90289	0.122424	0.254012
ompA	Rv0899	0.659752	6.71684	0.12259	0.254017
mfd	Rv1020	-0.646	8.01625	0.122554	0.254017
	Rv1988	0.649339	7.38428	0.122914	0.254455
pks15	Rv2947c	-0.659326	7.0239	0.122926	0.254455
rsbW	Rv3287c	0.673741	6.2589	0.12312	0.254728
	Rv1951c	0.690798	5.63859	0.123188	0.254741
	Rv0590A	-0.762704	4.43456	0.123733	0.255099
	Rv1549	-0.762704	4.43456	0.123733	0.255099
PE_PGRS46	Rv2634c	-0.685084	5.75718	0.123517	0.255099
	Rv2800	0.657003	6.98085	0.123634	0.255099
	Rv3300c	-0.668409	6.28847	0.123638	0.255099
rpsM	Rv3460c	0.637729	9.49566	0.123548	0.255099
	Rv3851	-0.726309	4.96955	0.123965	0.25545
PPE19	Rv1361c	-0.636319	9.74689	0.124164	0.255731
mce4F	Rv3494c	-0.646313	7.67151	0.124276	0.255833
rrs	Rvnr01	0.640019	8.44025	0.124497	0.25616
eccB1	Rv3869	-0.644779	7.91909	0.12458	0.256202
[truncated: 2,112 more rows]
